# Supplementary material
Source: MDPI journal article supplement (https://www.mdpi.com/2304-6740/9/11/82)
Supplement: s1 [file s1]

Archive with 5 entries (5 files):
- HoffmannJ190205_0m_a_cifreport.pdf
- HoffmannJ190409_0m_a_cifreport.pdf
- HoffmannJ190411_0m_a_cifreport.pdf
- HoffmannJ200204_0m_cifreport.pdf
- SI-phos.pdf
