# Supplementary material
Source: MDPI journal article supplement (https://www.mdpi.com/2304-6740/9/11/82)
Supplement: s1 [file s1 › SI-phos.pdf]

## Supporting Information

for

### The Bis(biphenyl)phosphorus Fragment in Trivalent and Tetravalent P-Environments

Jonas Hoffmann,<sup>1,2</sup> Daniel Dauvinage,<sup>3</sup> Enno Lork,<sup>3</sup> Anne Staubitz<sup>1,2</sup>

<sup>1</sup> University of Bremen, Institute for Organic and Analytical Chemistry, University of Bremen, Leobener Straße 7, D-28359 Bremen, Germany, [jonas.hoffmann@uni-bremen.de](mailto:jonas.hoffmann@uni-bremen.de) (J.H.); [staubitz@uni-bremen.de](mailto:staubitz@uni-bremen.de) (A.S.)

<sup>2</sup> University of Bremen, MAPEX Center for Materials and Processes, University of Bremen, Bibliothekstraße 1, D-28359 Bremen, Germany

<sup>3</sup> University of Bremen, Institute for Inorganic Chemistry and Crystallography, University of Bremen, Leobener Straße 7, D-28359 Bremen, Germany; [duvinage@uni-bremen.de](mailto:duvinage@uni-bremen.de) (D.D.), [enno.lork@uni-bremen.de](mailto:enno.lork@uni-bremen.de) (E.L.)

Corresponding author: [staubitz@uni-bremen.de](mailto:staubitz@uni-bremen.de)

## Table of contents

|                                                                                    |    |
|------------------------------------------------------------------------------------|----|
| NMR Spectra.....                                                                   | 3  |
| Dichloro- <i>N,N</i> -diisopropylphosphanamine ( <b>A</b> ) .....                  | 3  |
| <i>bis</i> (Biphenyl-2-yl)- <i>N,N</i> -diisopropylphosphanamine ( <b>B</b> )..... | 4  |
| <i>bis</i> (Biphenyl-2-yl)chlorophosphine ( <b>C</b> ) .....                       | 6  |
| <i>bis</i> (Biphenyl-2-yl)phosphine ( <b>D</b> ).....                              | 7  |
| Lithium <i>bis</i> (biphenyl-2-yl)phosphide ( <b>E</b> ) .....                     | 9  |
| <i>bis</i> (Biphenyl-2-yl)phosphine borane ( <b>F</b> ) .....                      | 12 |
| <i>bis</i> (Biphenyl-2-yl)(trimethylsilyl)phosphine ( <b>G</b> ) .....             | 15 |
| <i>bis</i> (Biphenyl-2-yl)(trimethyltin)phosphine ( <b>H</b> ) .....               | 17 |
| Single crystal analysis .....                                                      | 20 |

# NMR Spectra

## Dichloro-*N,N*-diisopropylphosphanamine (**A**)

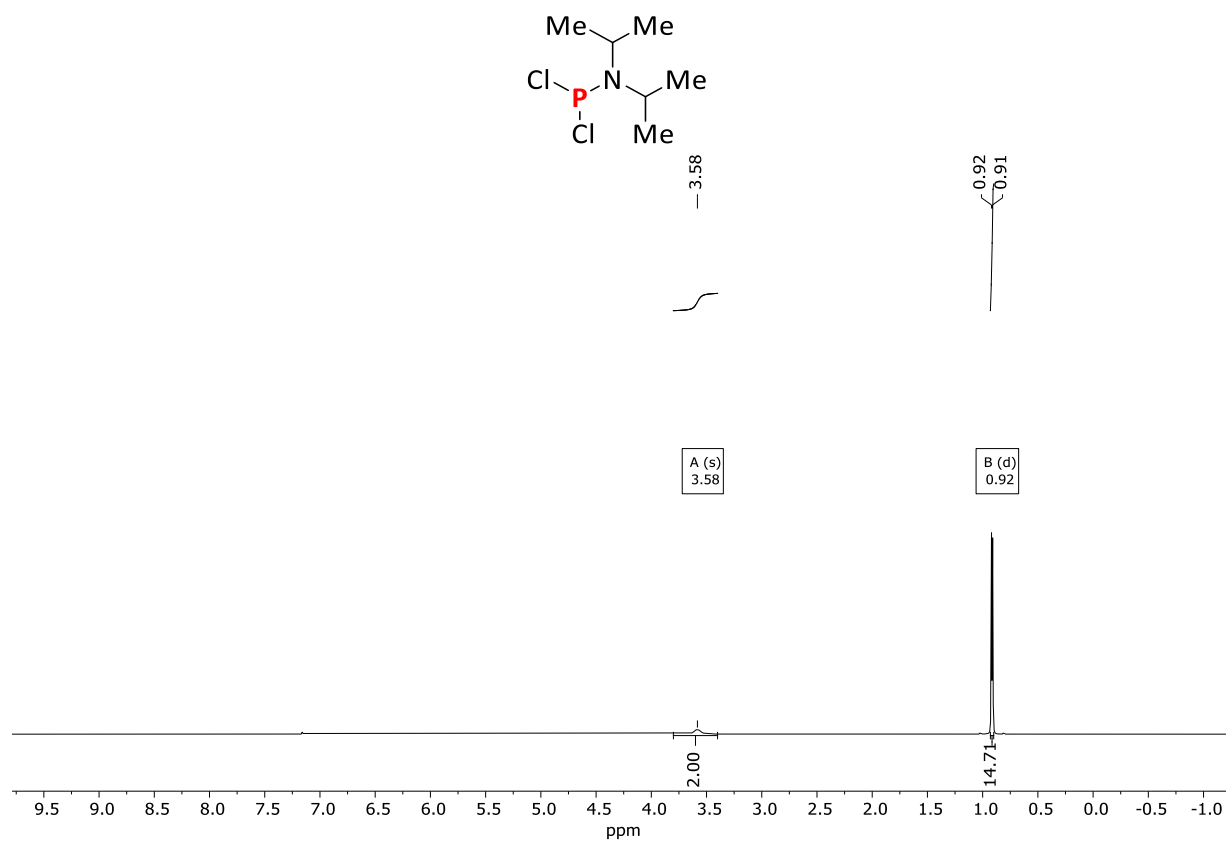

Fig SI 1: <sup>1</sup>H NMR (600 MHz) of compound **A** in benzene-*d*<sub>6</sub>.

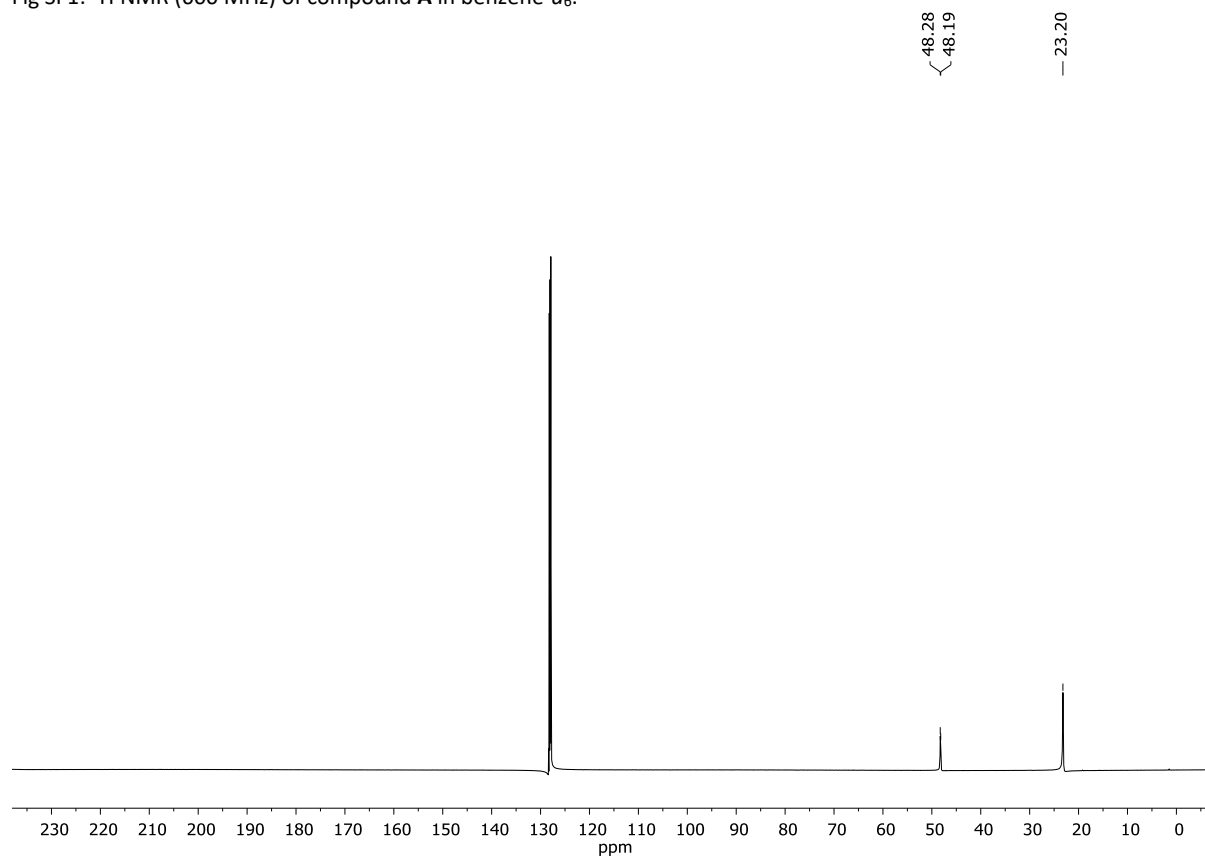

Fig SI 2: <sup>13</sup>C{<sup>1</sup>H} NMR (151 MHz) of compound **A** in benzene-*d*<sub>6</sub>.

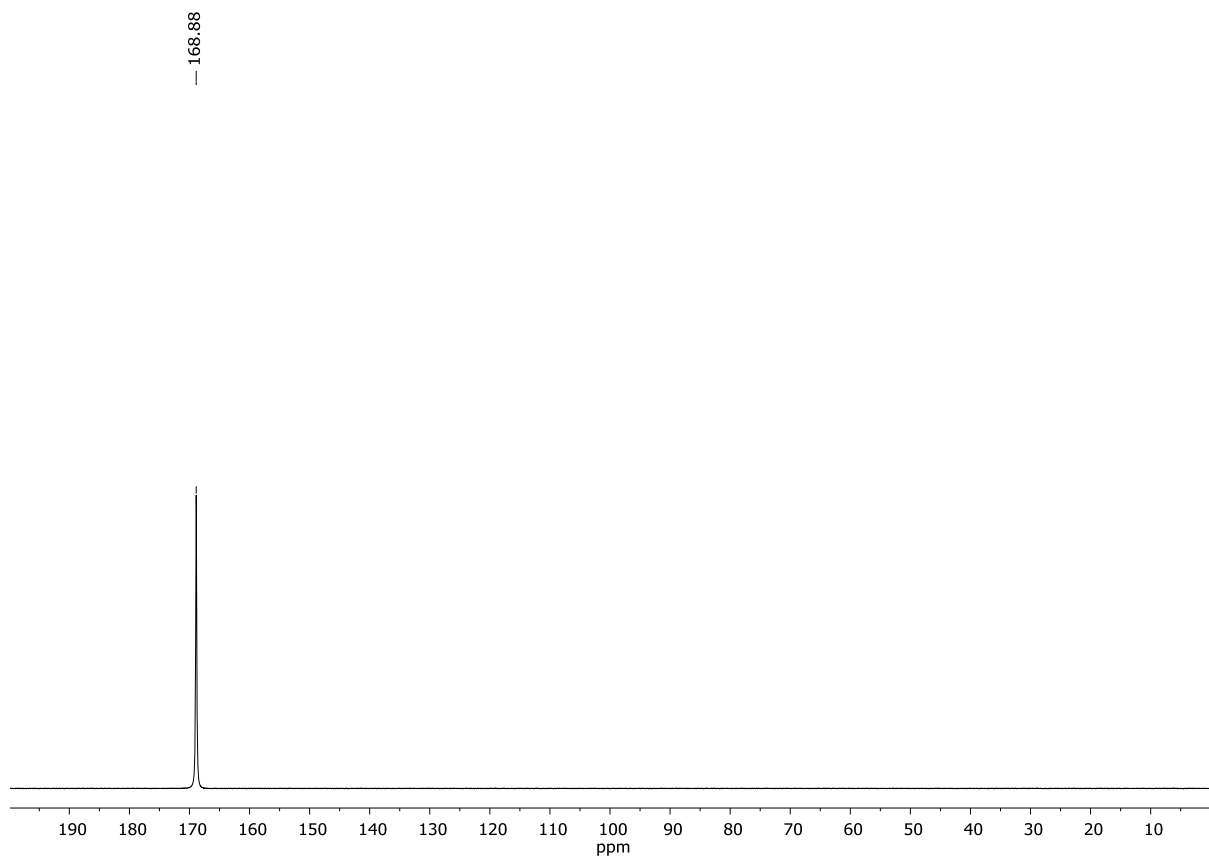

Fig SI 3:  $^{31}\text{P}\{^1\text{H}\}$  NMR (243 MHz) of compound **A** in benzene- $d_6$ .

*bis*(Biphenyl-2-yl)-*N,N*-diisopropylphosphanamine (**B**)

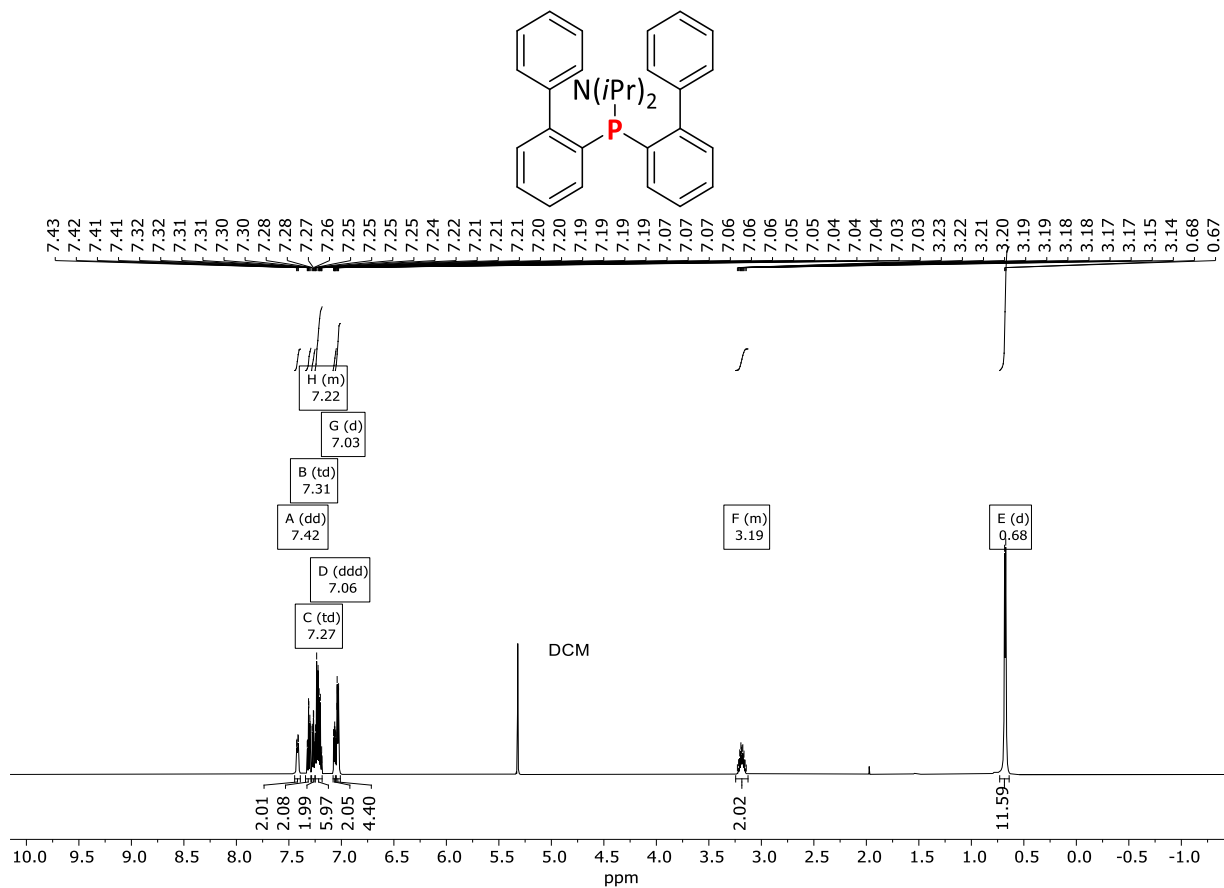

Fig SI 4:  $^1\text{H}$  NMR (600 MHz) of compound **B** in dichloromethane- $d_2$ .

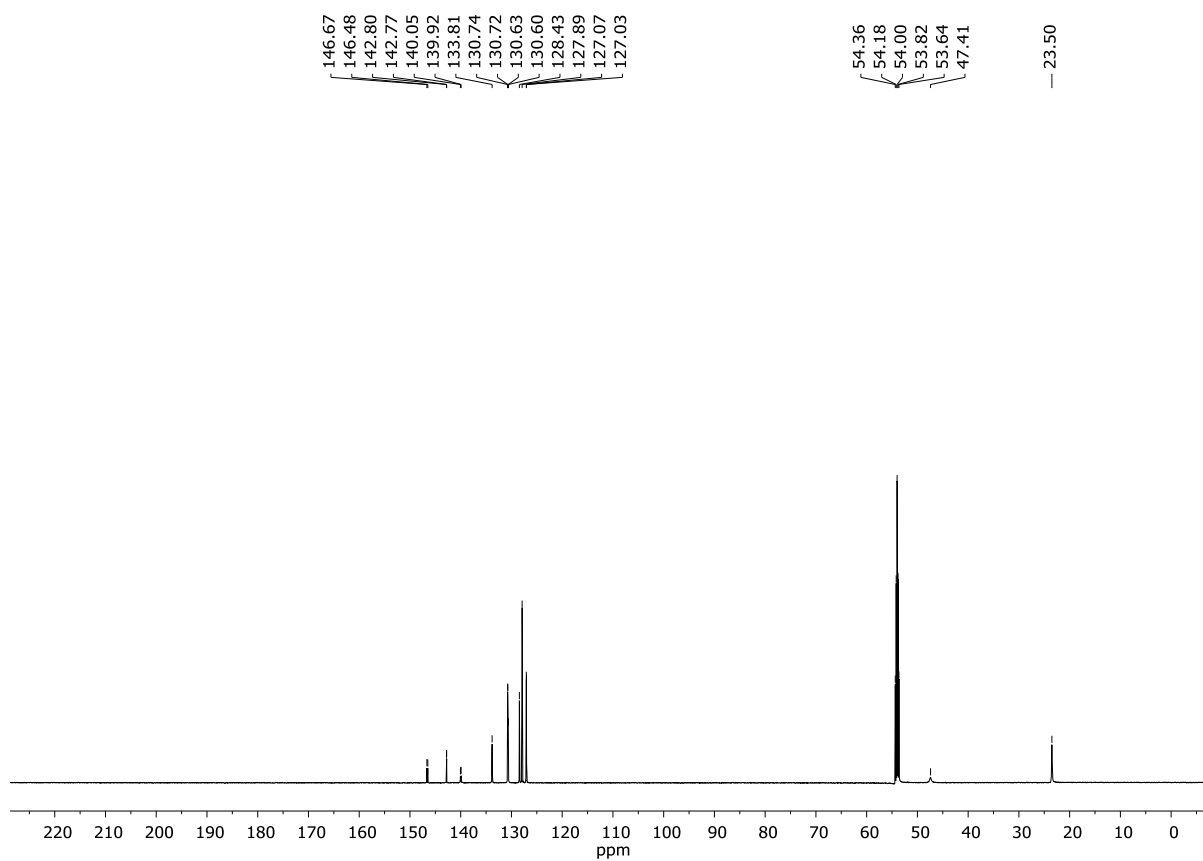

Fig SI 5:  $^{13}\text{C}\{^1\text{H}\}$  NMR (151 MHz) of compound **B** in dichloromethane- $d_2$ .

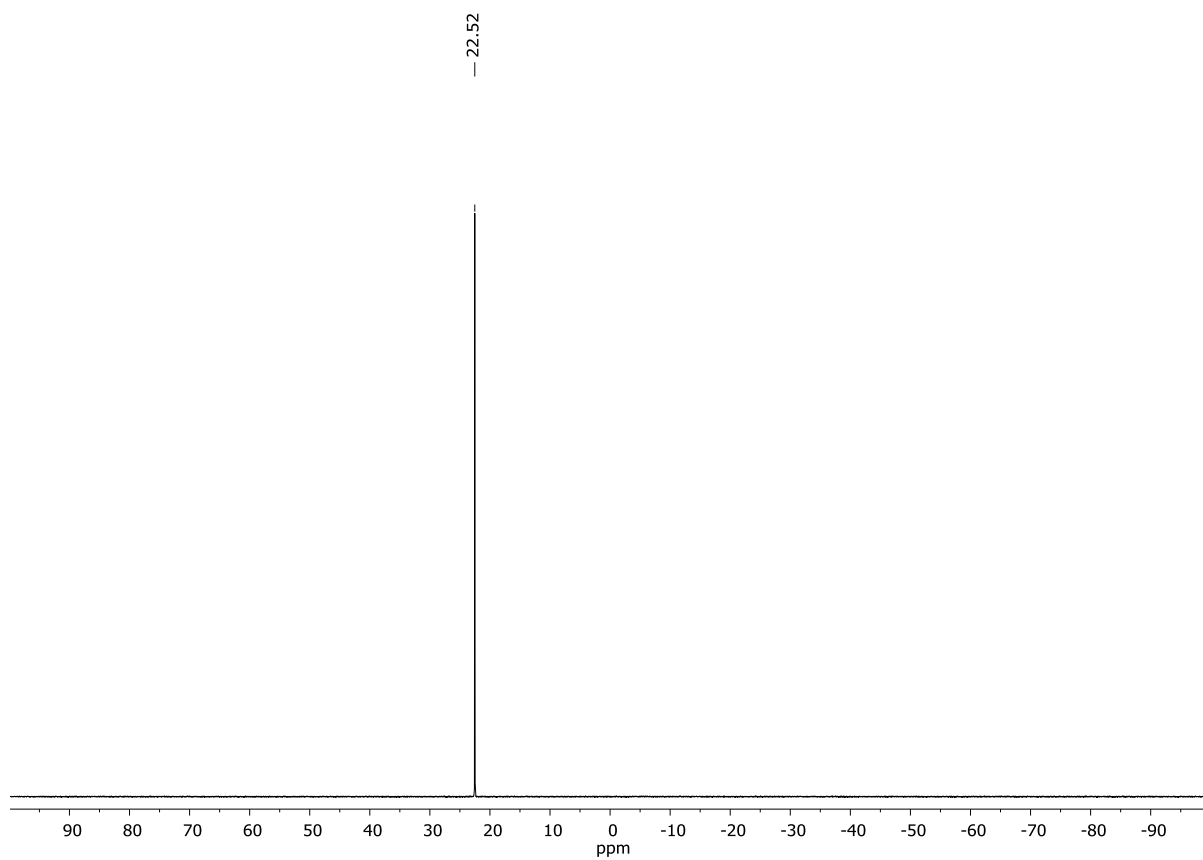

Fig SI 6:  $^{31}\text{P}\{^1\text{H}\}$  NMR (243 MHz) of compound **B** in dichloromethane- $d_2$ .

*bis*(Biphenyl-2-yl)chlorophosphine (**C**)

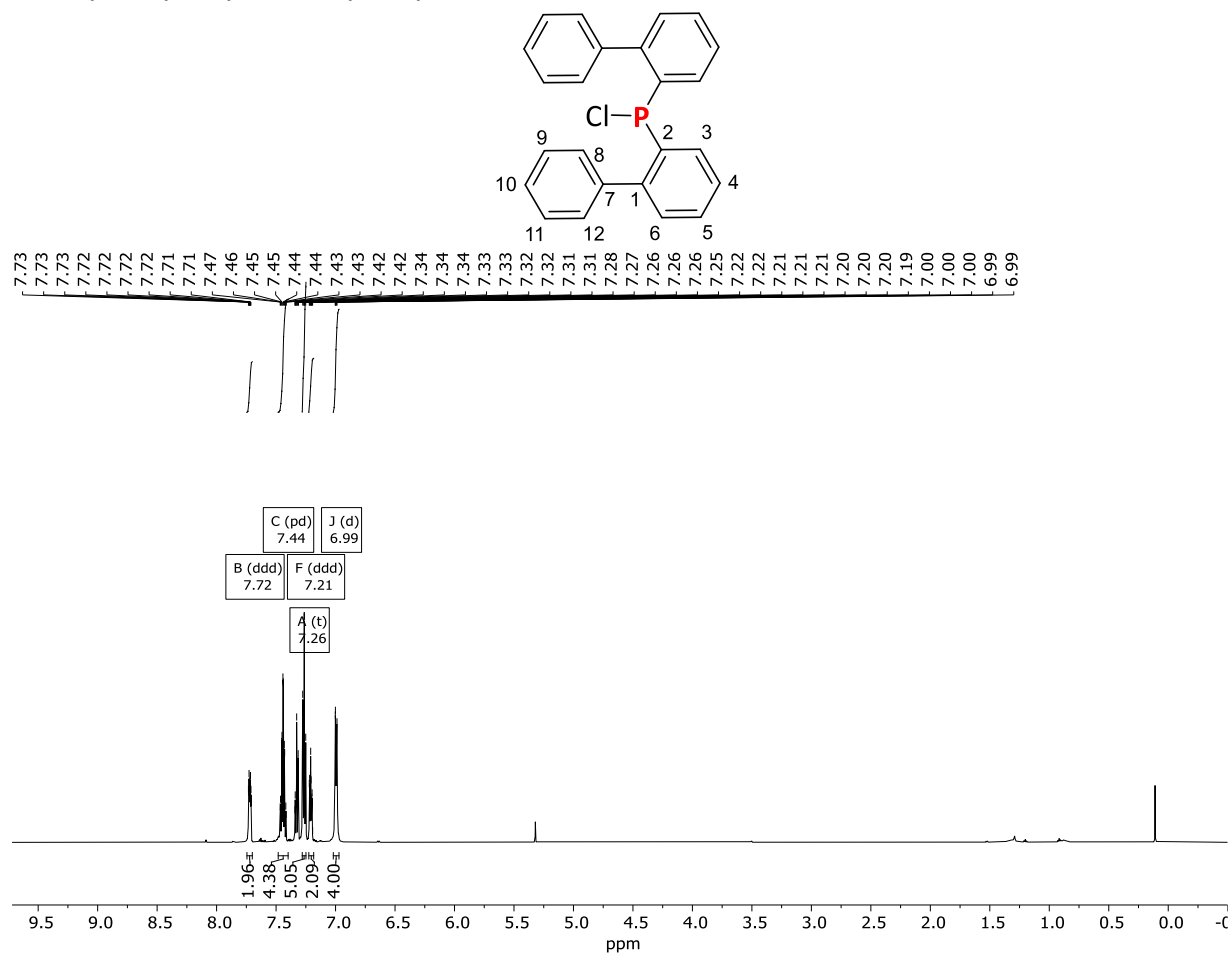

Fig SI 7:  $^1\text{H}$  NMR (600 MHz) of compound **C** in benzene- $d_6$ .

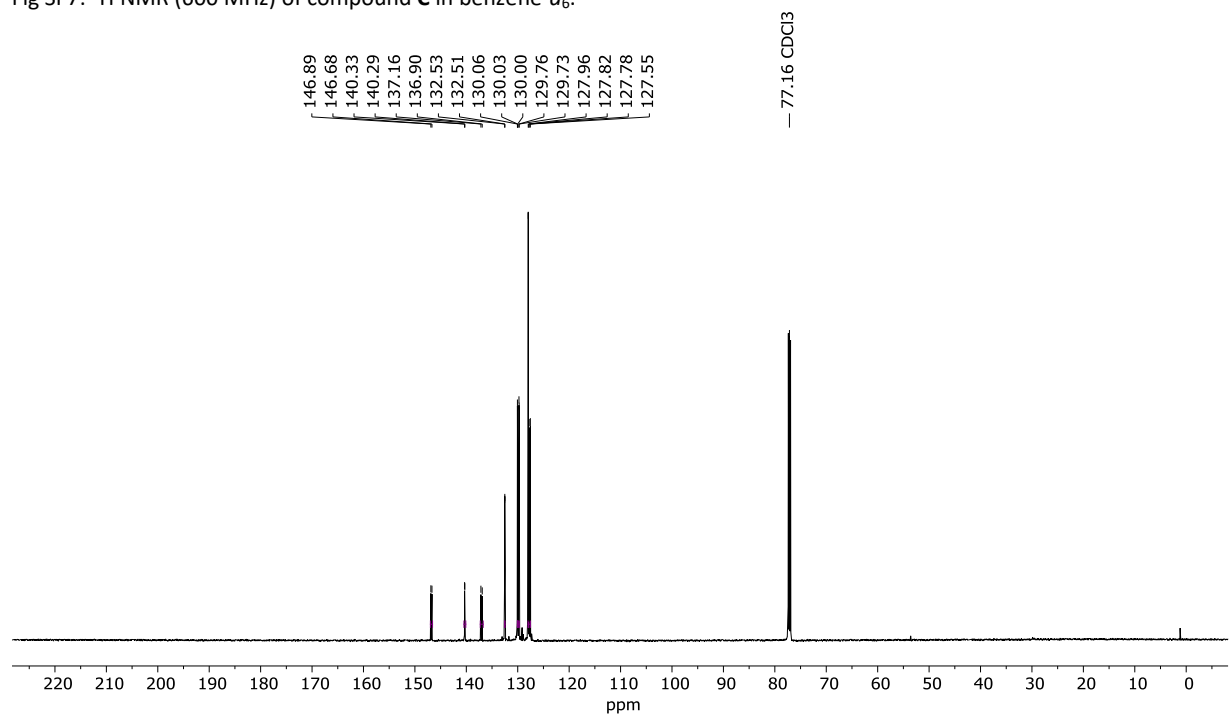

Fig SI 8:  $^{13}\text{C}\{^1\text{H}\}$  NMR (151 MHz) of compound **C** in chloroform- $d$ .

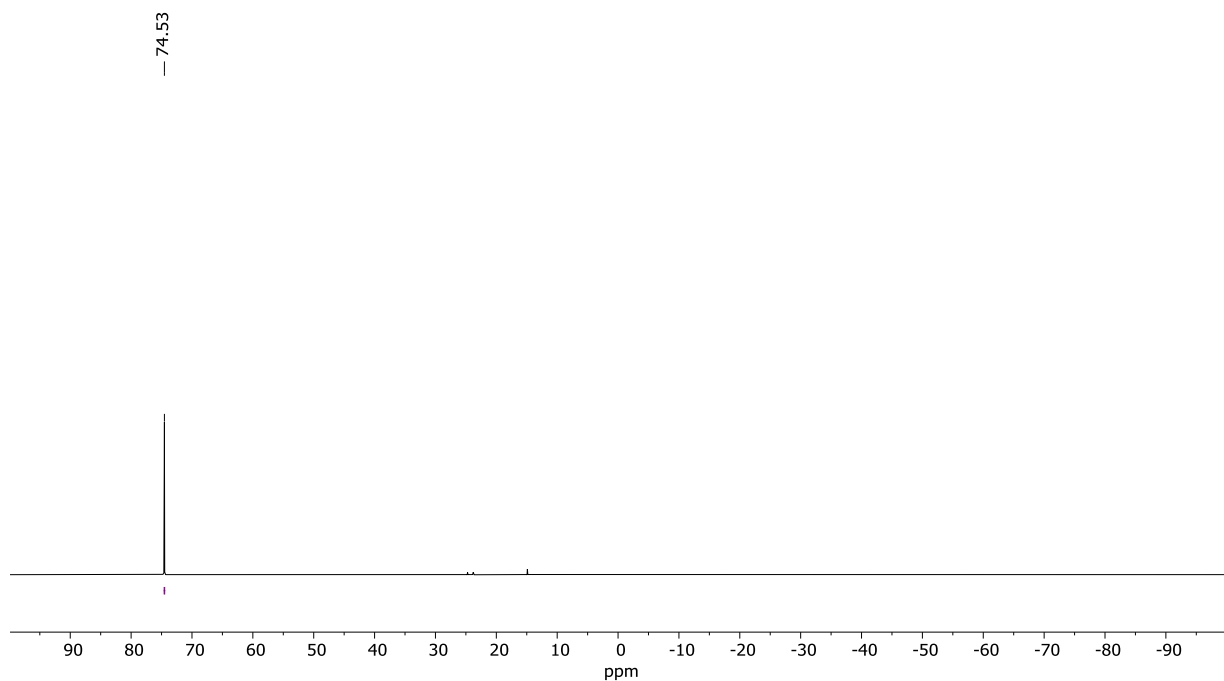

Fig SI 9:  $^{31}\text{P}\{^1\text{H}\}$  NMR (243 MHz) of compound **D** in chloroform- $d$ .

**bis(Biphenyl-2-yl)phosphine (D)**

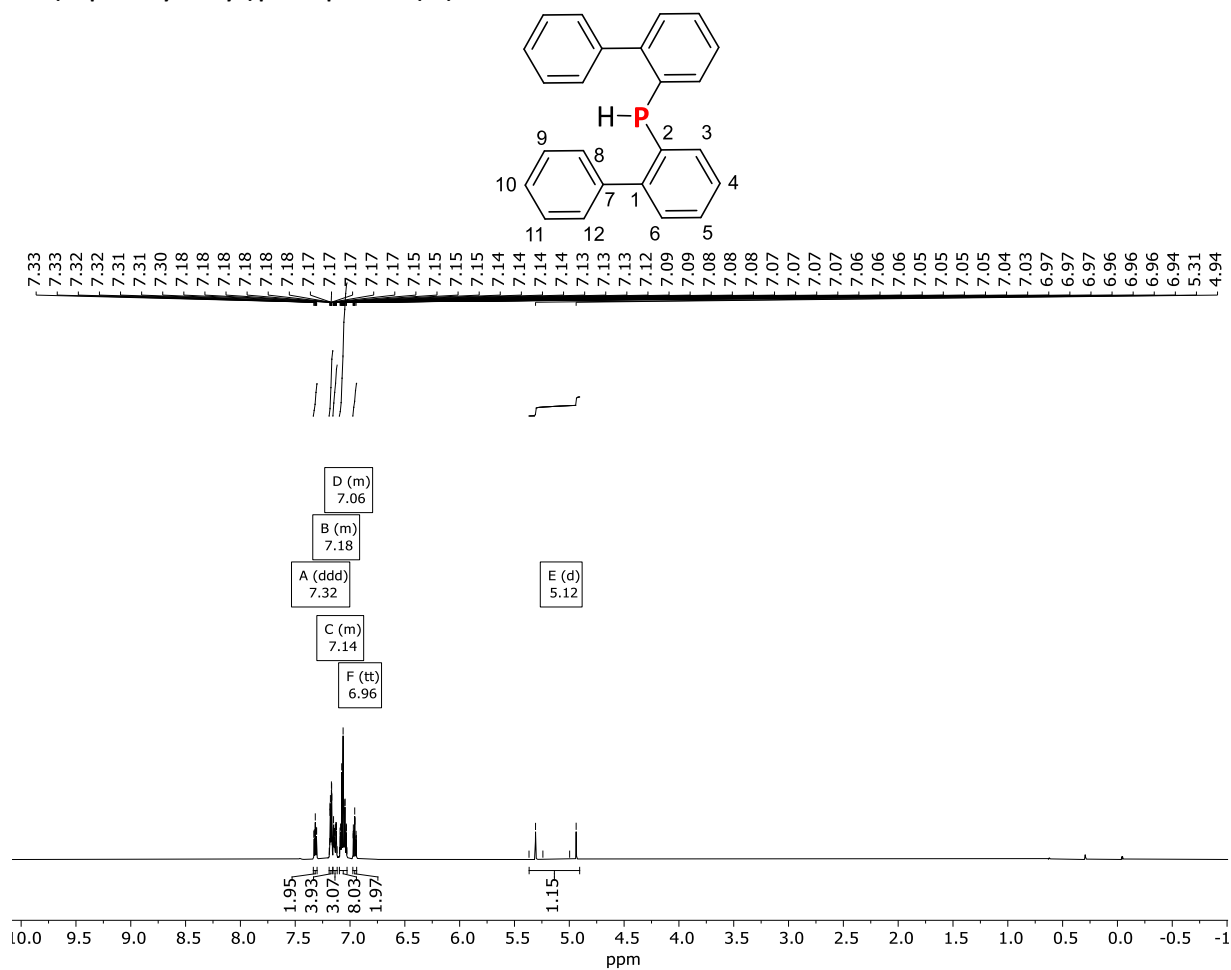

Fig SI 10:  $^1\text{H}$  NMR (600 MHz) of compound **D** in benzene- $d_6$ .

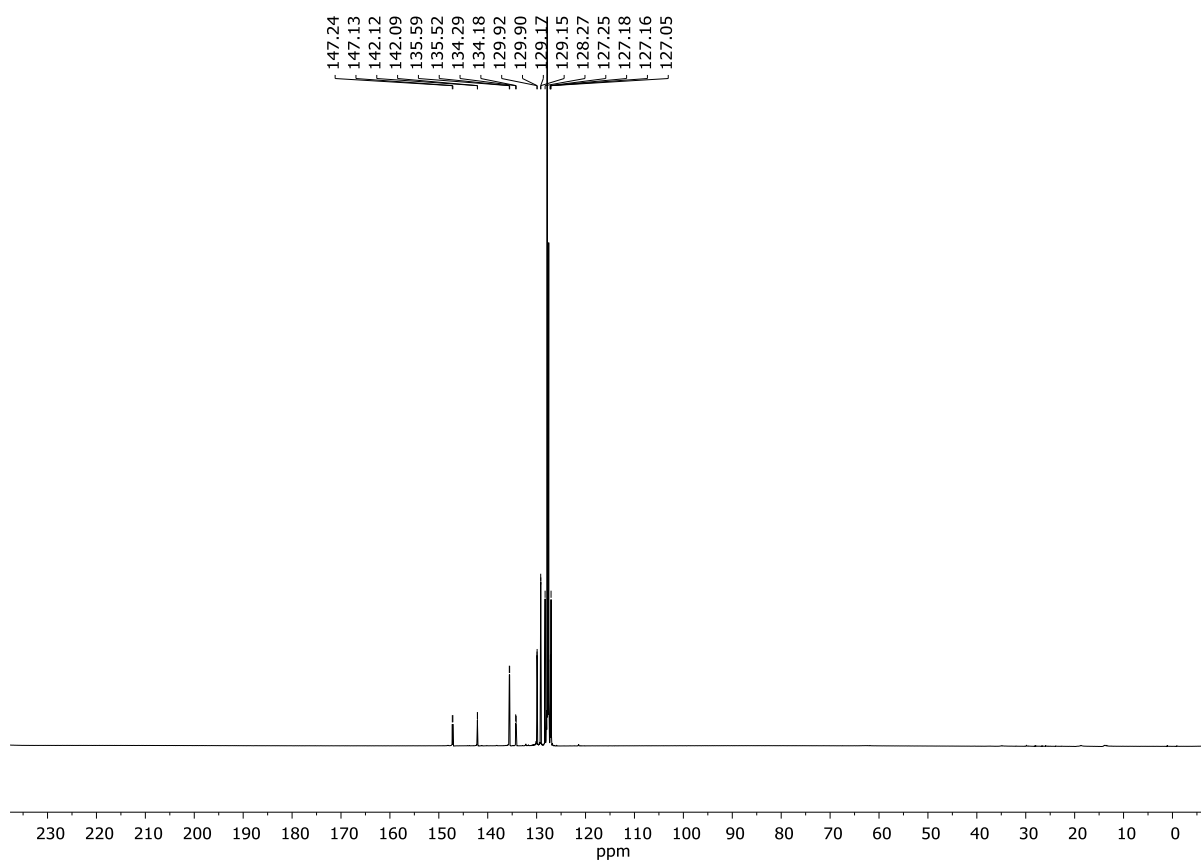

Fig SI 11:  $^{13}\text{C}\{^1\text{H}\}$  NMR (151 MHz) of compound **D** in benzene- $d_6$ .

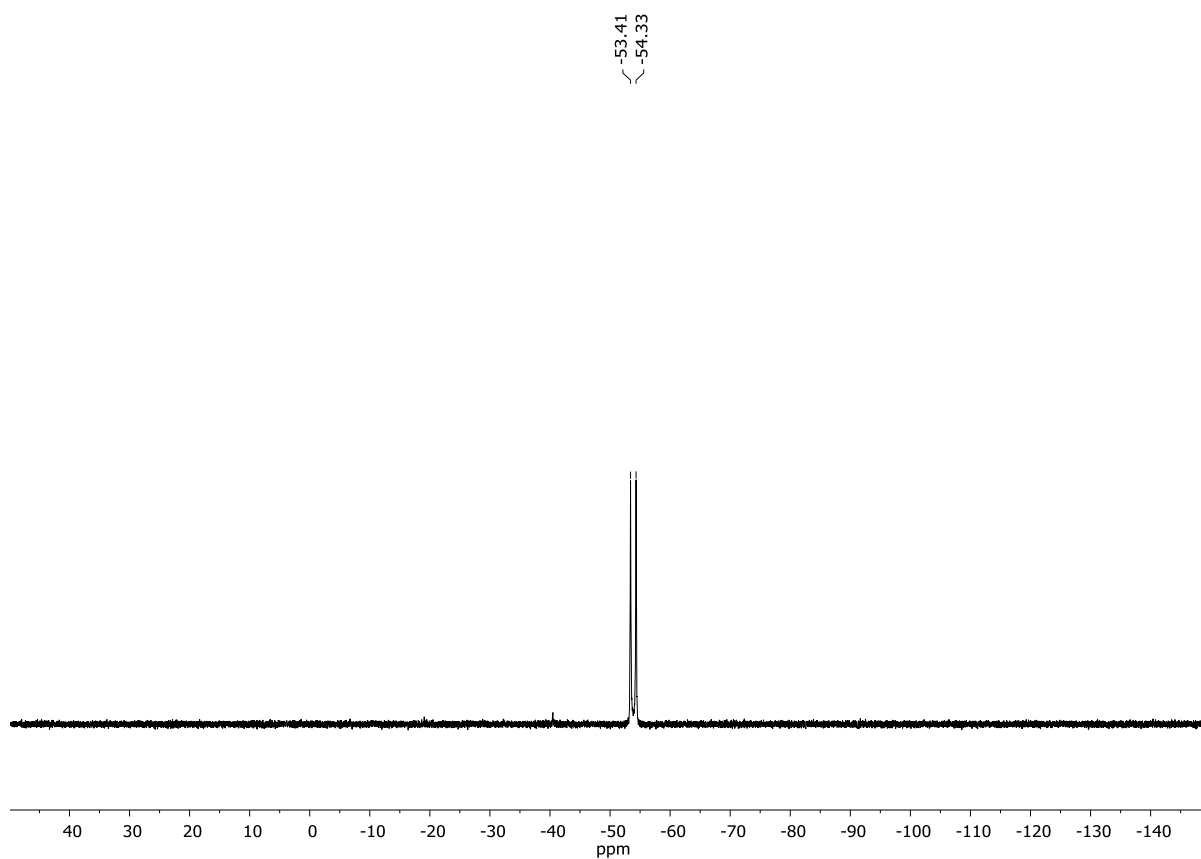

Fig SI 12:  $^{31}\text{P}$  NMR (243 MHz) of compound **D** in benzene- $d_6$ .

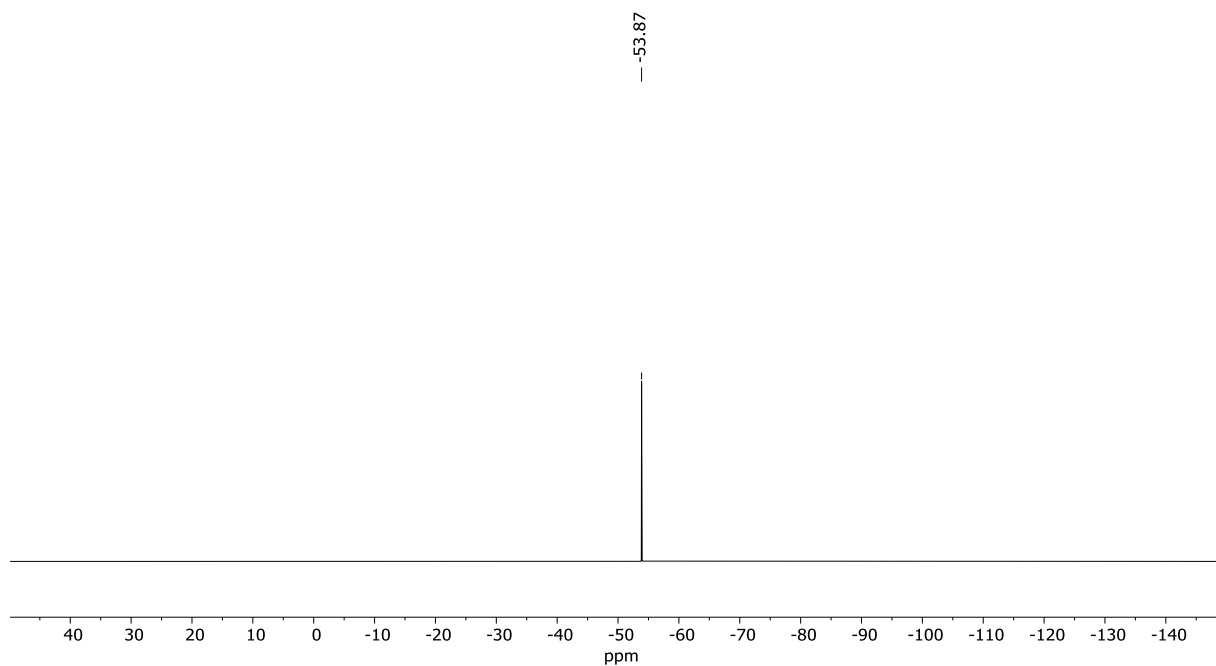

Fig SI 13:  $^{31}\text{P}\{^1\text{H}\}$  NMR (243 MHz) of compound **D** in benzene- $d_6$ .

### Lithium *bis*(biphenyl-2-yl)phosphide (**E**)

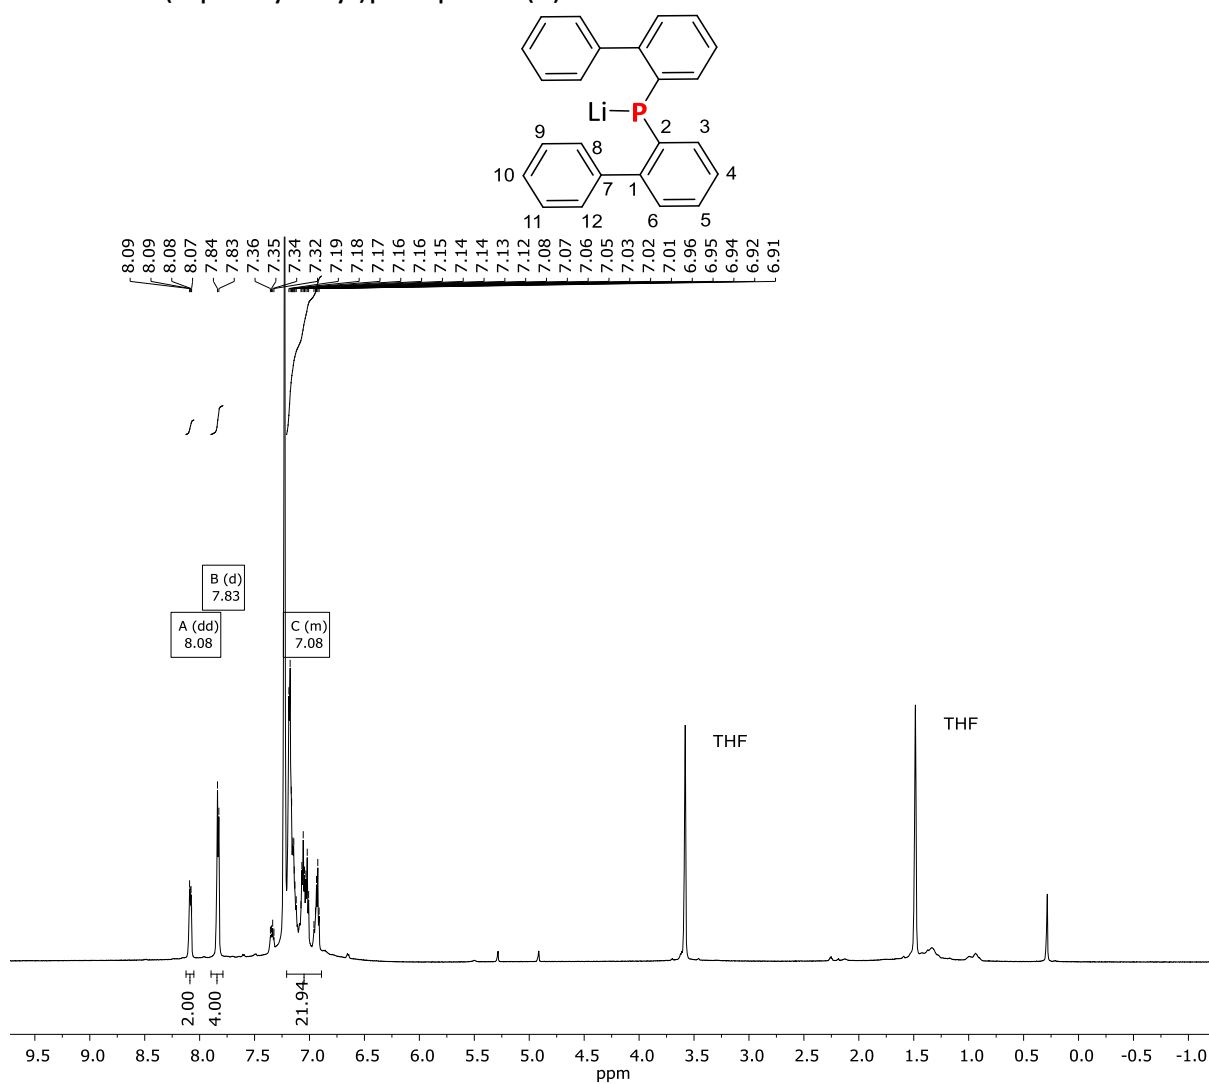

Fig SI 14:  $^1\text{H}$  NMR (600 MHz) of compound **E** in benzene- $d_6$ /tetrahydrofuran- $d_8$  (80:20).

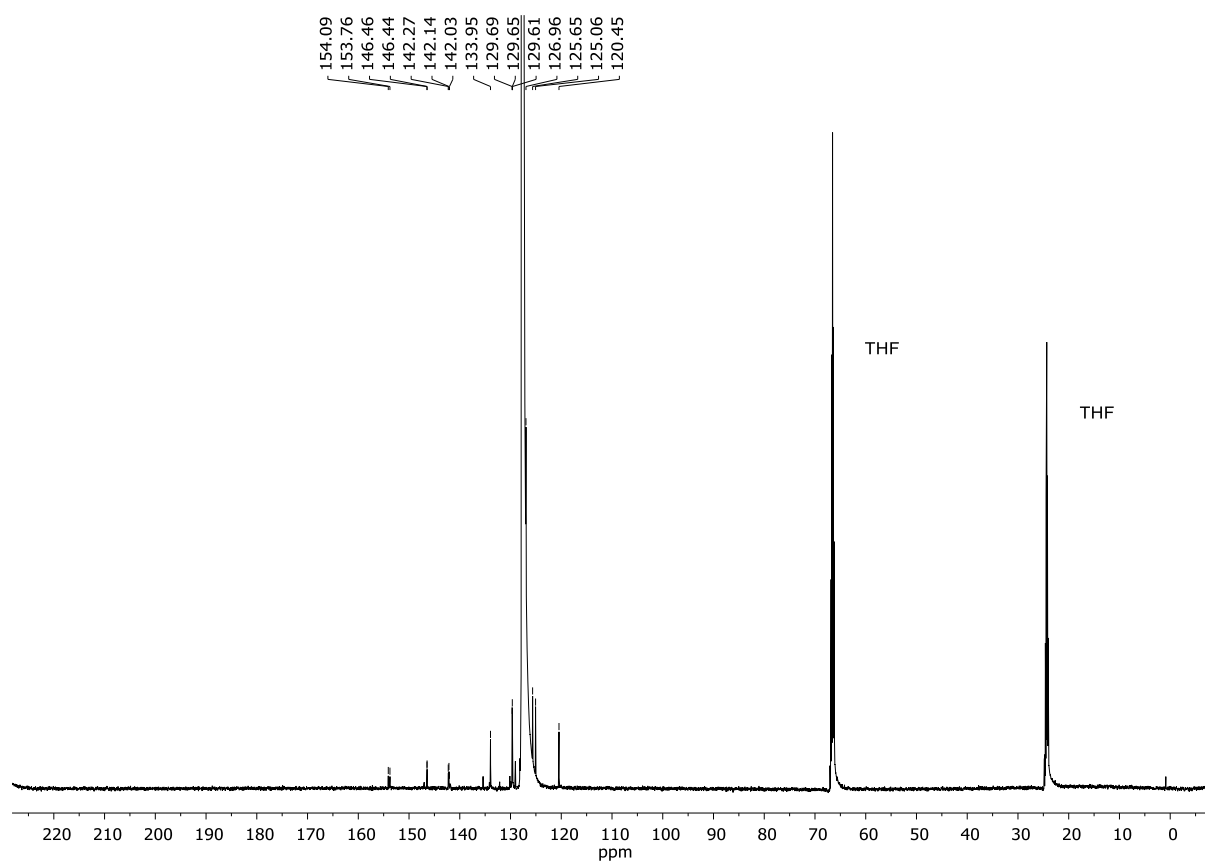

Fig SI 15:  $^{13}\text{C}\{^1\text{H}\}$  NMR (151 MHz) of compound **E** in benzene- $d_6$ /tetrahydrofuran- $d_8$  (80:20).

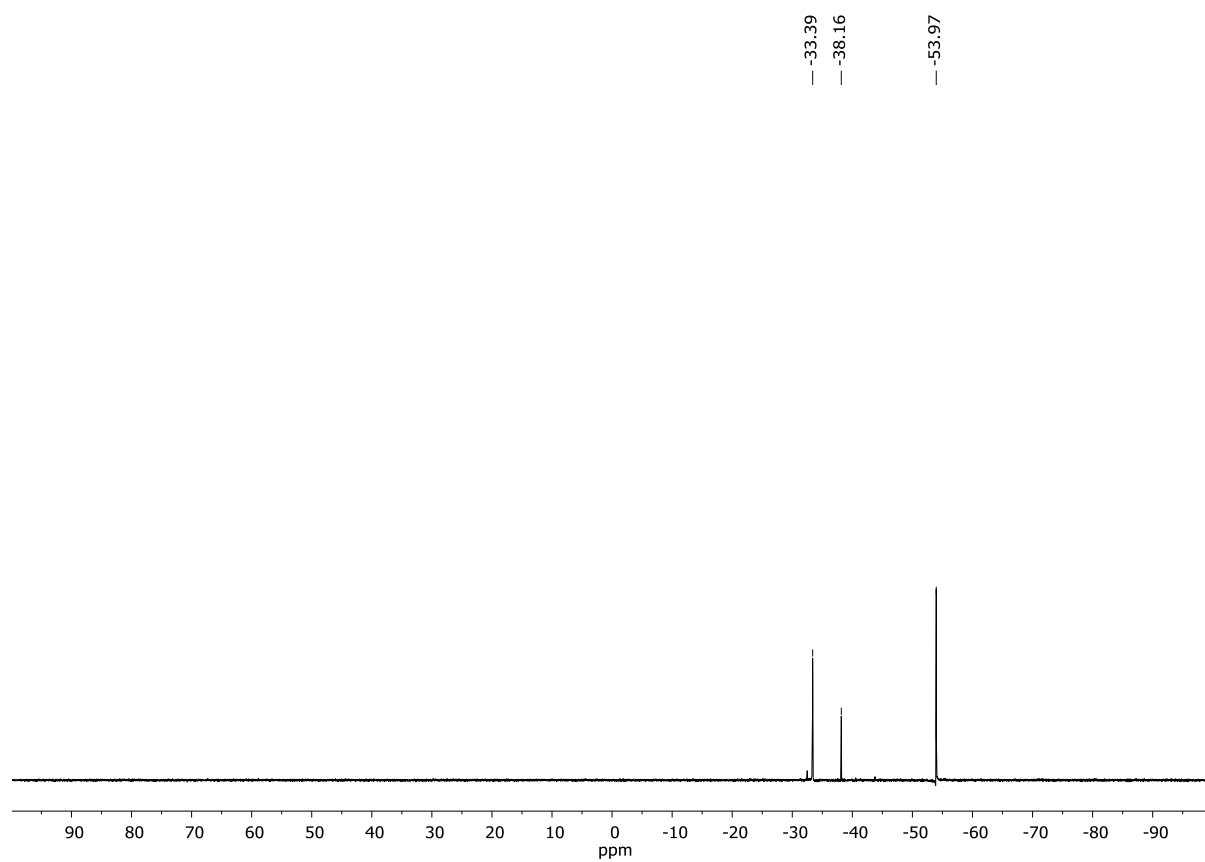

Fig SI 16:  $^{31}\text{P}\{^1\text{H}\}$  NMR (243 MHz) of compound **E** in benzene- $d_6$ /tetrahydrofuran- $d_8$  (80:20).

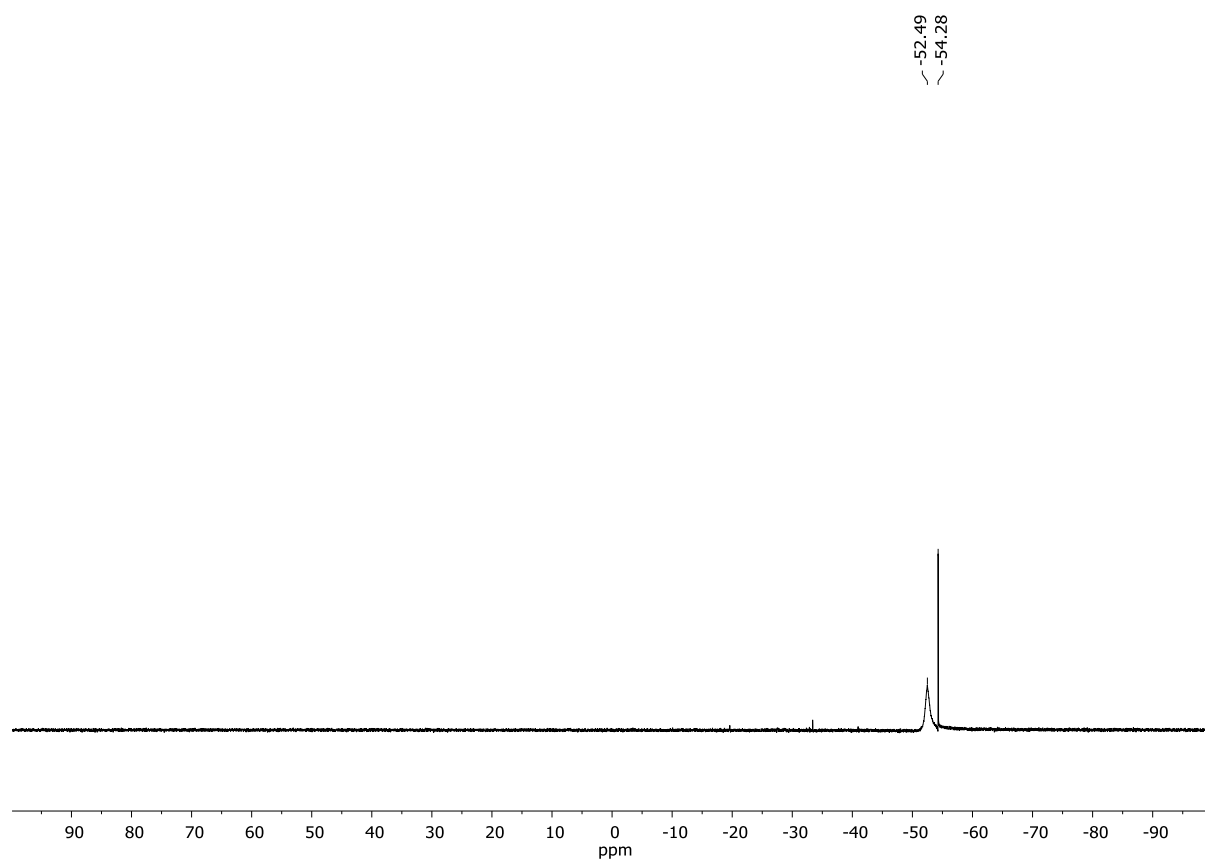

Fig SI 17: <sup>31</sup>P{<sup>1</sup>H} NMR (243 MHz) of compound **E** in benzene-*d*<sub>6</sub>.

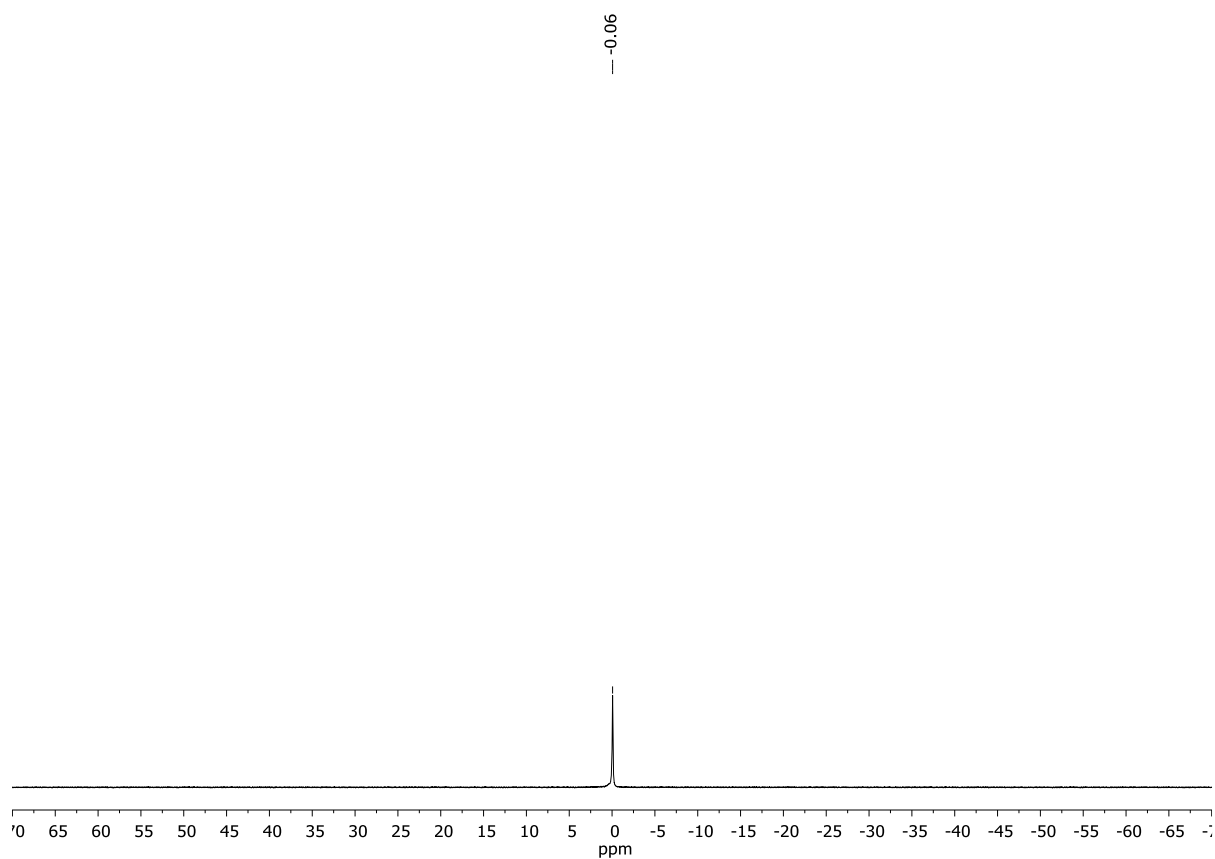

Fig SI 18: <sup>7</sup>Li NMR (233 MHz) of compound **E** in benzene-*d*<sub>6</sub>/tetrahydrofuran-*d*<sub>8</sub> (80:20).

*bis*(Biphenyl-2-yl)phosphine borane (**F**)

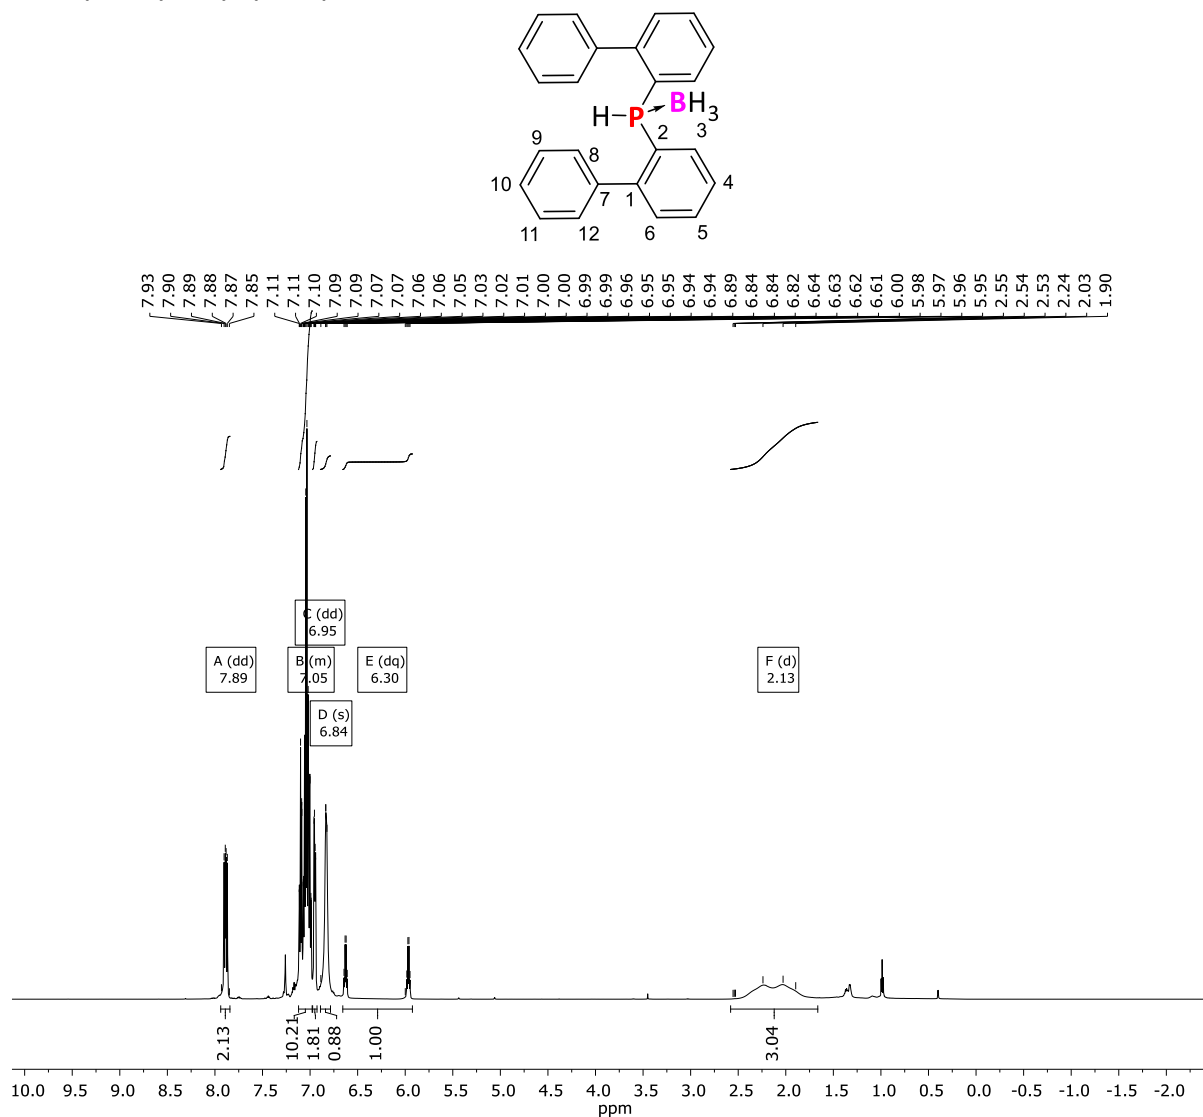

Fig SI 19: <sup>1</sup>H NMR (600 MHz) of compound **F** in benzene-*d*<sub>6</sub>.

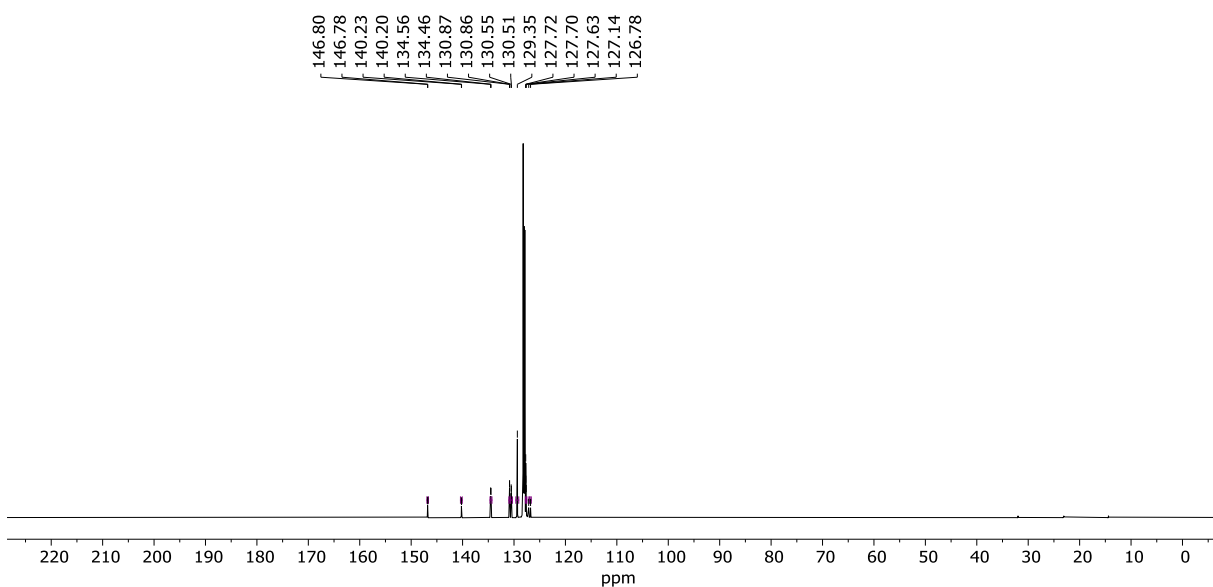

Fig SI 20: <sup>13</sup>C{<sup>1</sup>H} NMR (151 MHz) of compound **F** in benzene-*d*<sub>6</sub>.

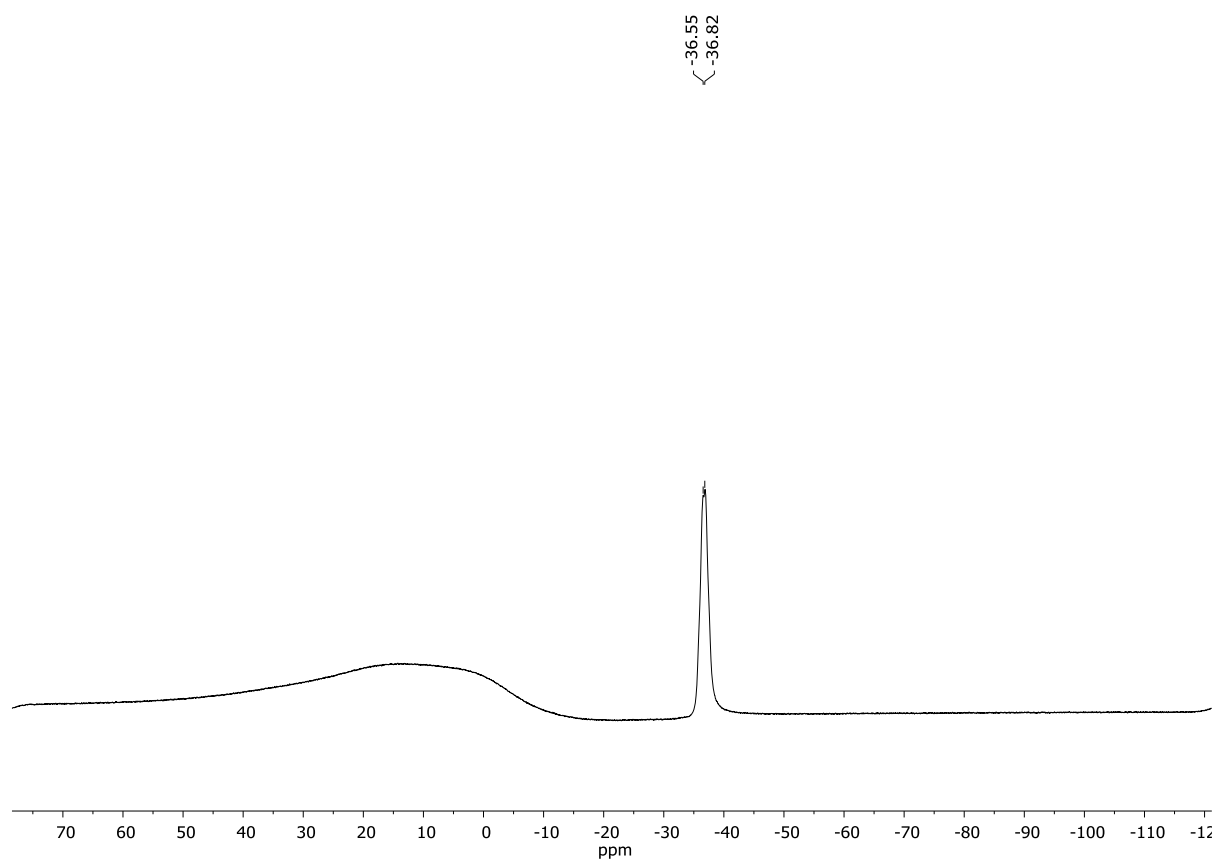

Fig SI 21:  $^{11}\text{B}$  NMR (193 MHz) of compound **F** in benzene- $d_6$ .

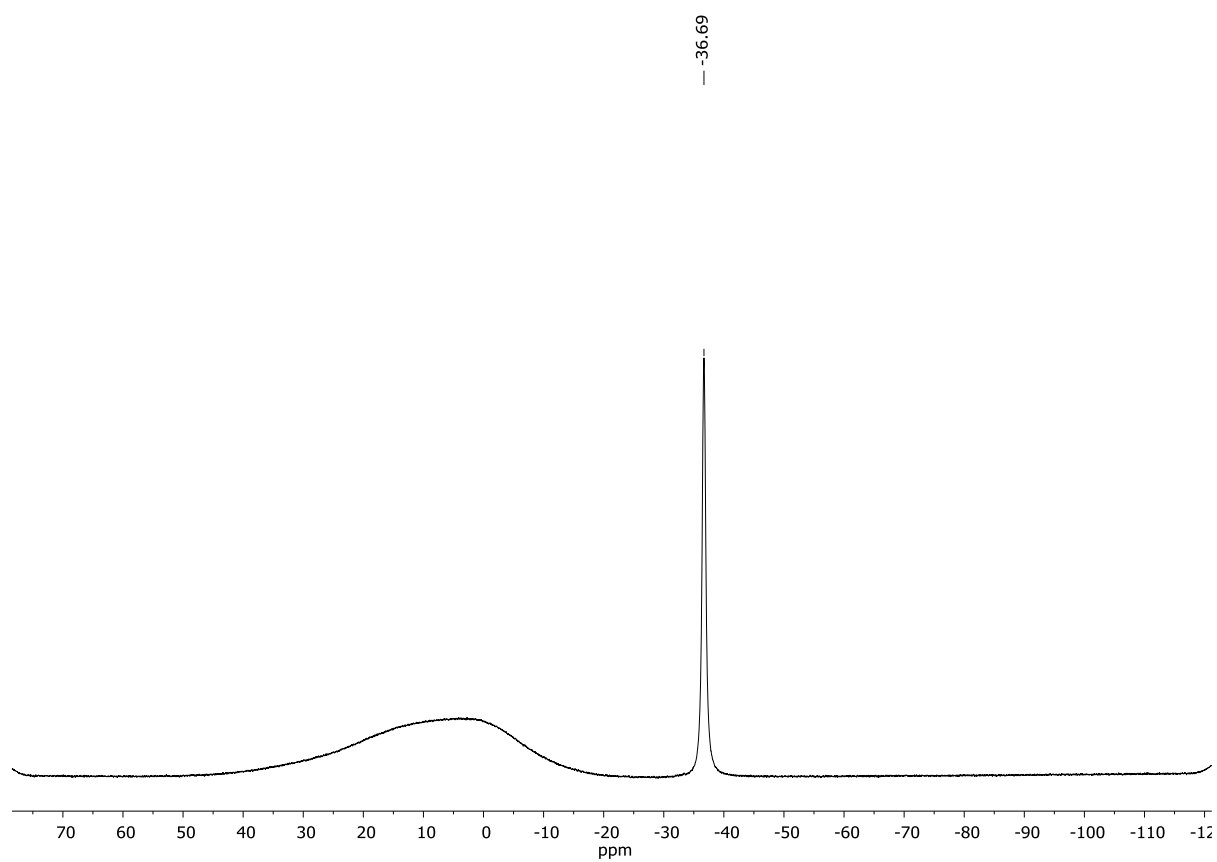

Fig SI 22:  $^{11}\text{B}\{^1\text{H}\}$  NMR (193 MHz) of compound **F** in benzene- $d_6$ .

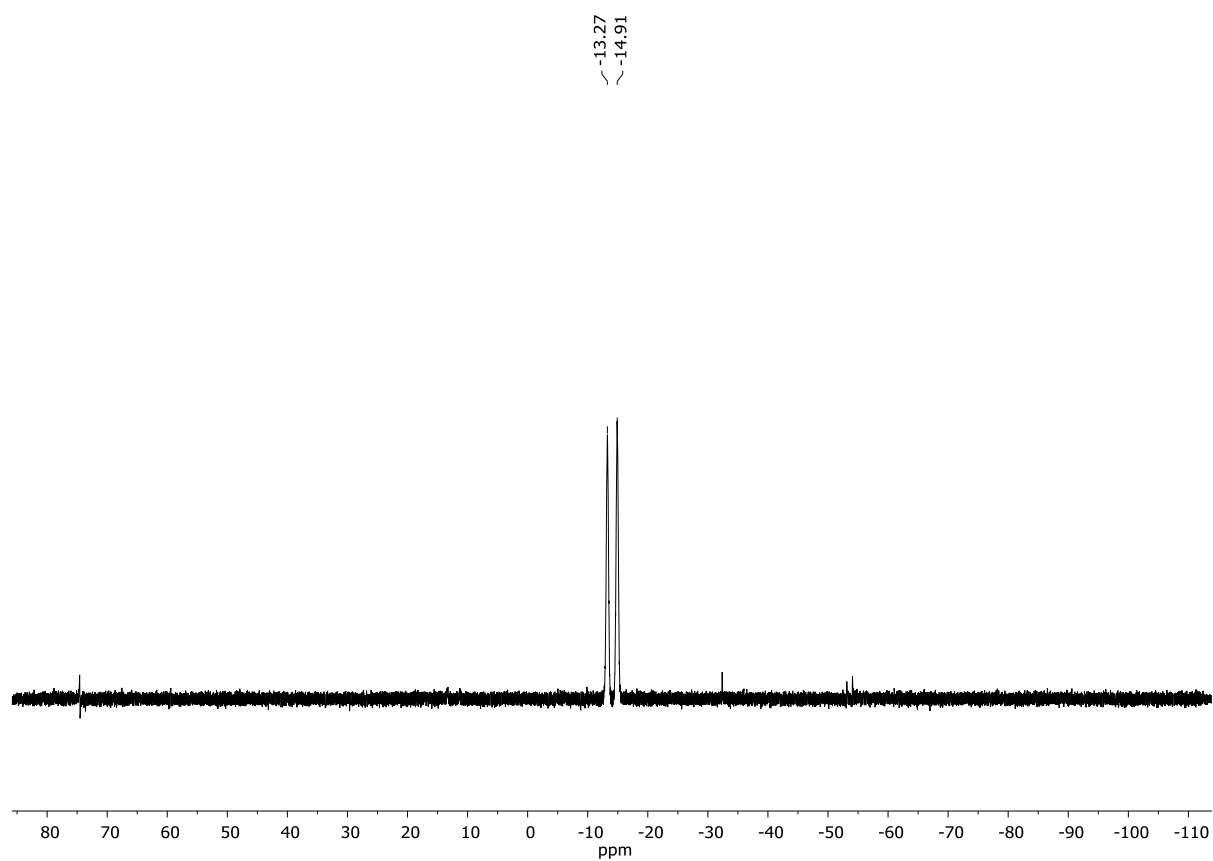

Fig SI 23: <sup>31</sup>P NMR (243 MHz) of compound **F** in benzene-*d*<sub>6</sub>.

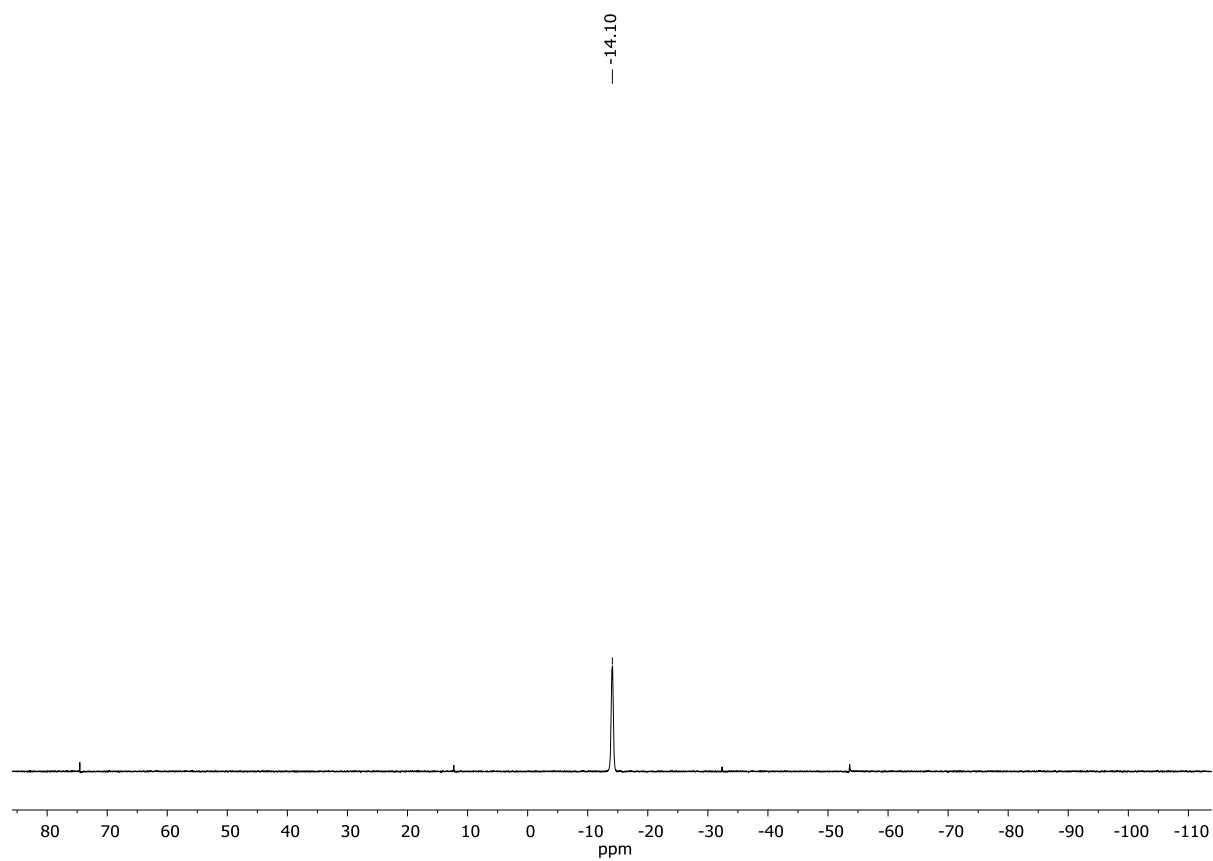

Fig SI 24: <sup>31</sup>P{<sup>1</sup>H} NMR (243 MHz) of compound **F** in benzene-*d*<sub>6</sub>.

*bis*(Biphenyl-2-yl)(trimethylsilyl)phosphine (**G**)

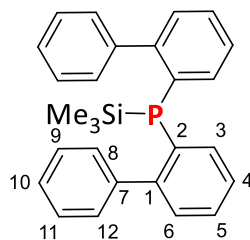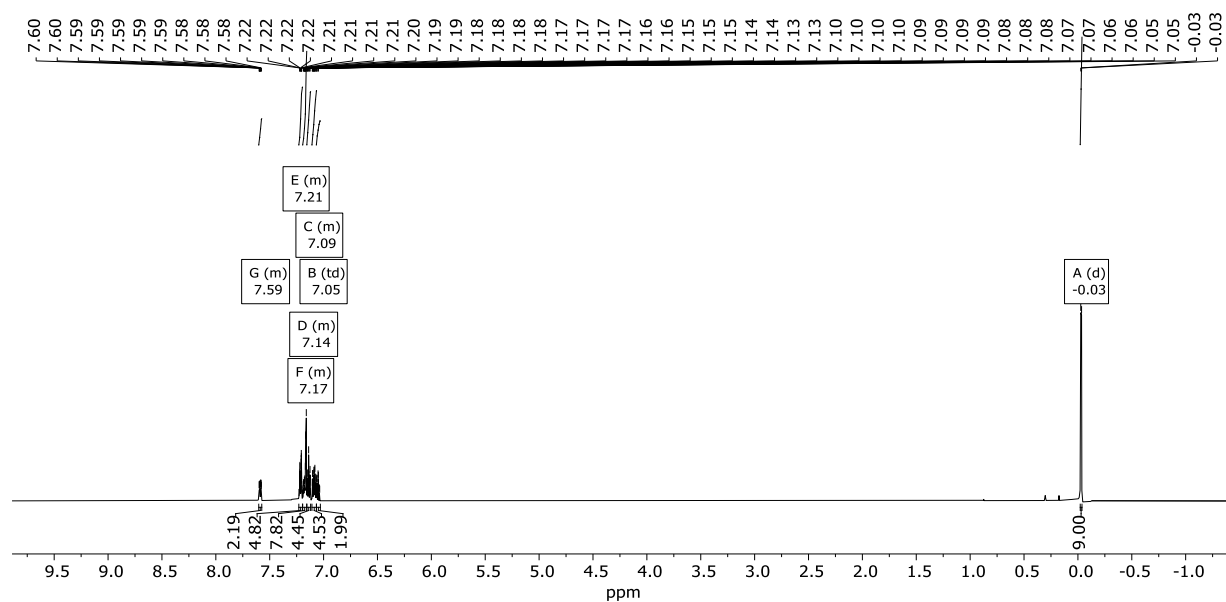

Fig SI 25:  $^1\text{H}$  NMR (600 MHz) of compound **G** in benzene- $d_6$ .

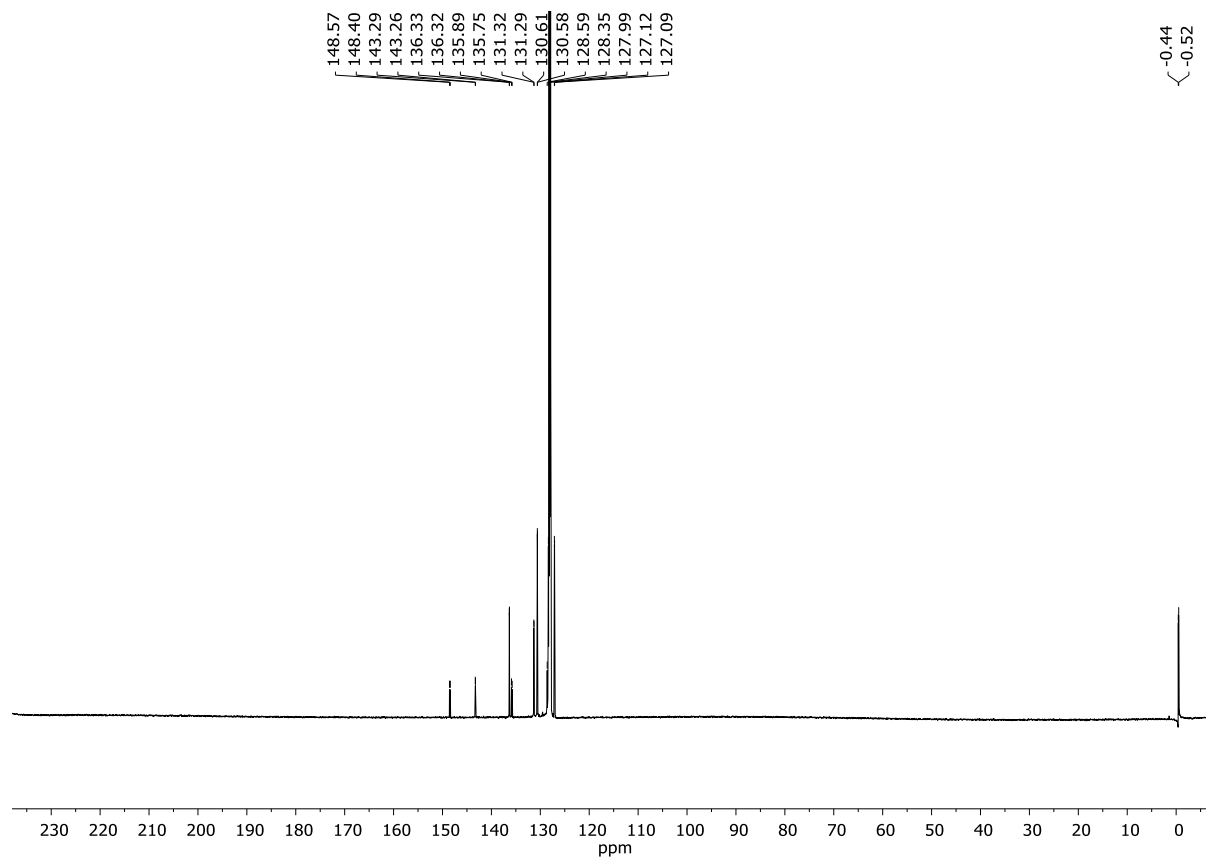

Fig SI 26:  $^{13}\text{C}\{^1\text{H}\}$  NMR (151 MHz) of compound **G** in benzene- $d_6$ .

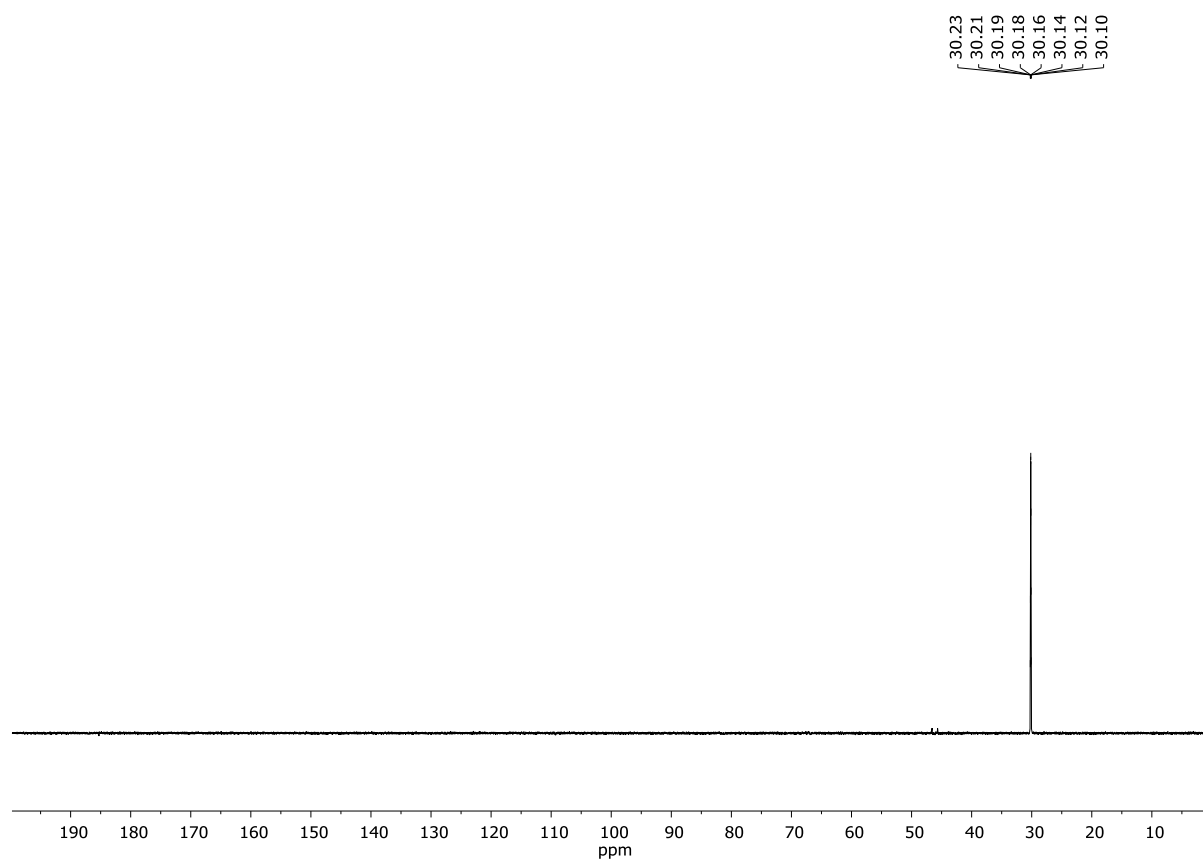

Fig S127:  $^{31}\text{P}$  NMR (243 MHz) of compound **G** in benzene- $d_6$ .

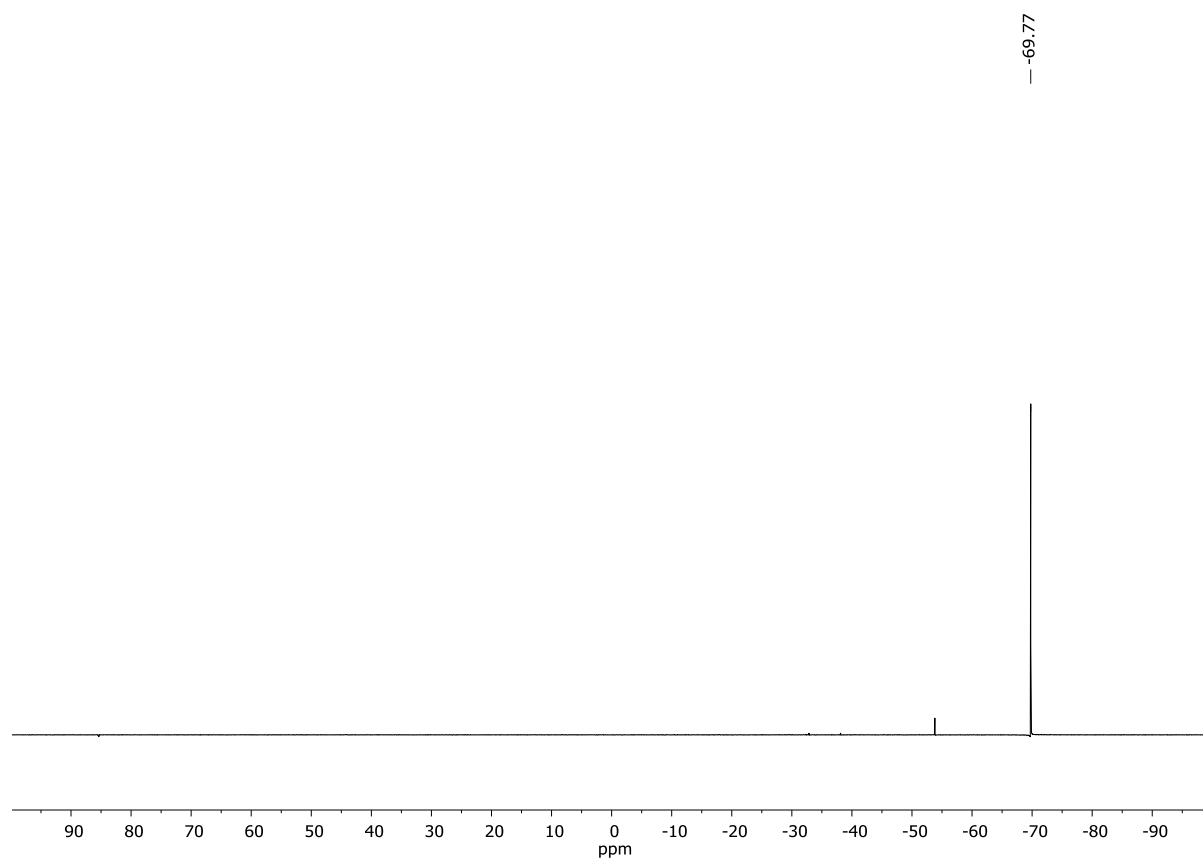

Fig S128:  $^{31}\text{P}\{^1\text{H}\}$  NMR (243 MHz) of compound **G** in benzene- $d_6$ .

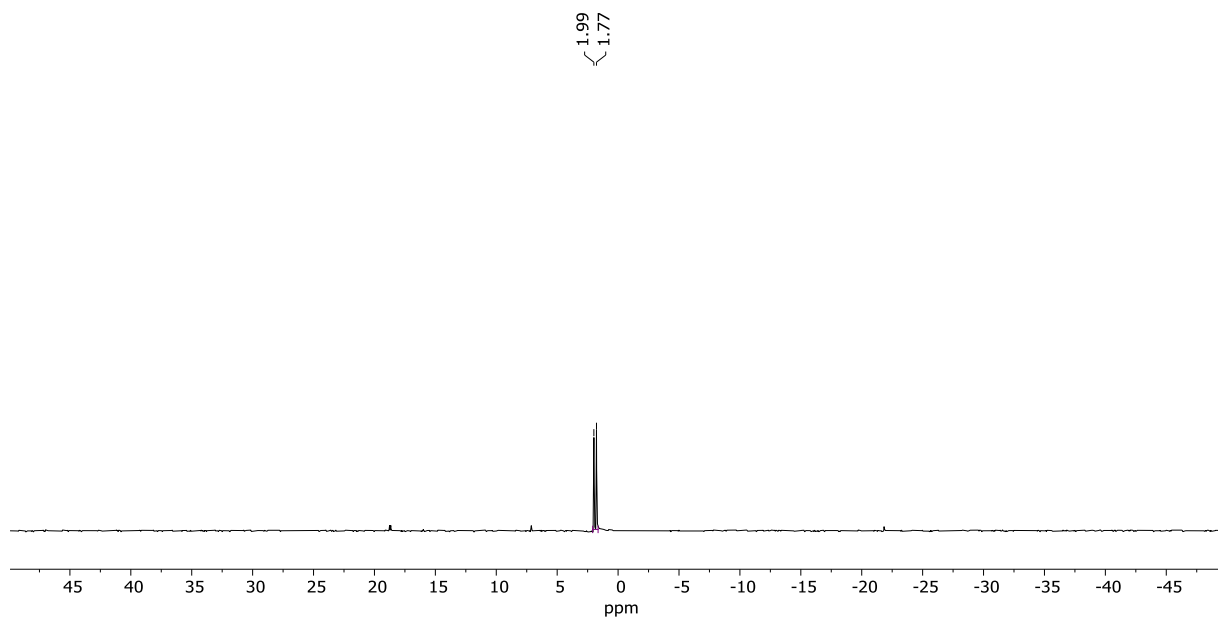

Fig SI29:  $^{29}\text{Si}\{^1\text{H}\}$  DEPT NMR (119 MHz) of compound **G** in benzene- $d_6$ .

**bis(Biphenyl-2-yl)(trimethyltin)phosphine (H)**

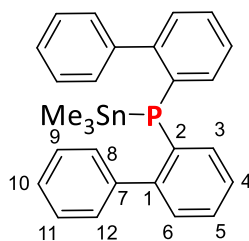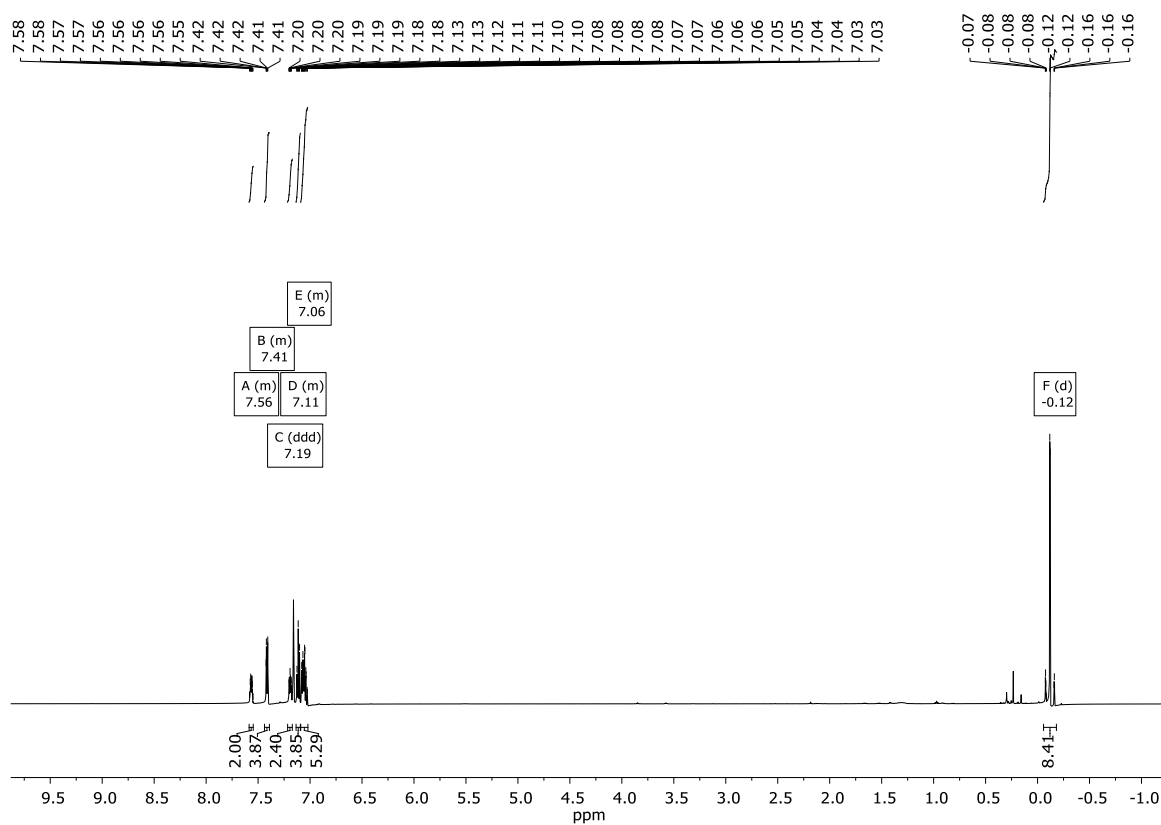

Fig SI 30:  $^1\text{H}$  NMR (600 MHz) of compound **H** in benzene- $d_6$ .

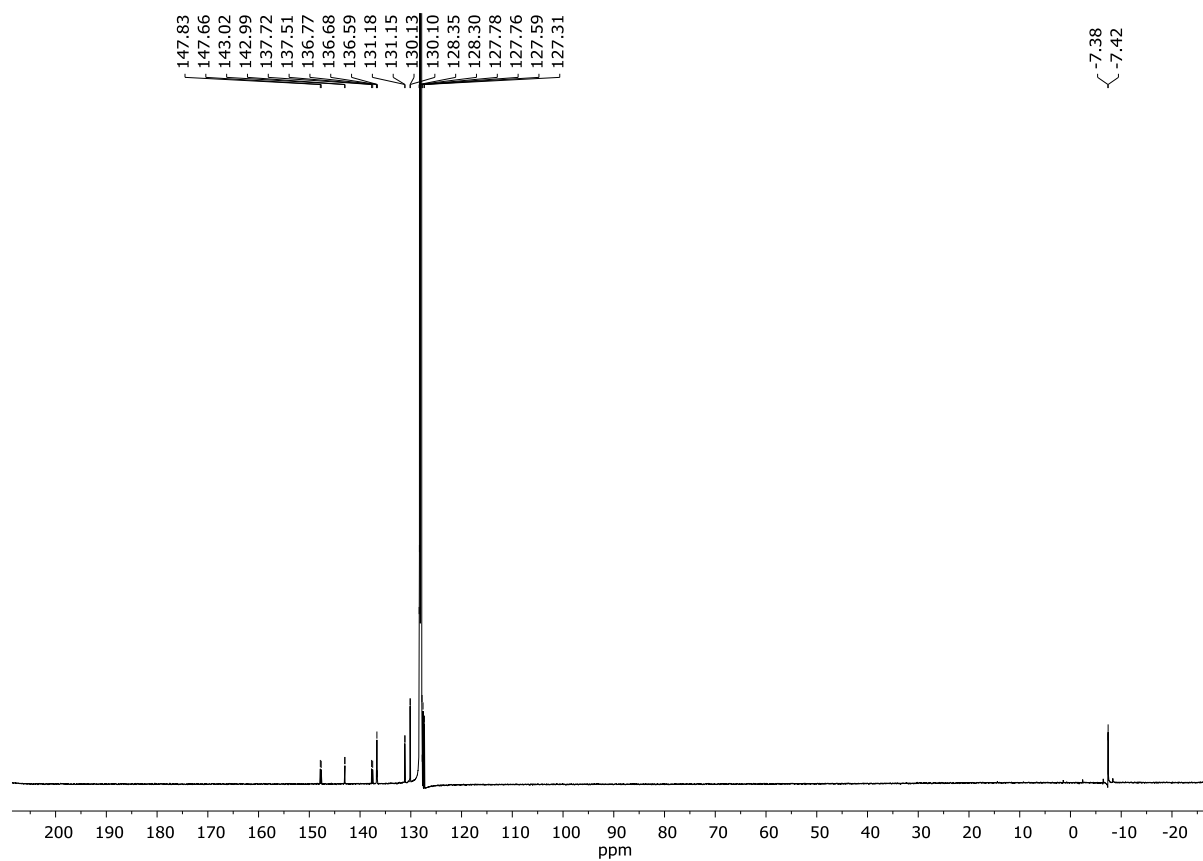

Fig SI 31:  $^{13}\text{C}\{^1\text{H}\}$  NMR (151 MHz) of compound **H** in benzene- $d_6$ .

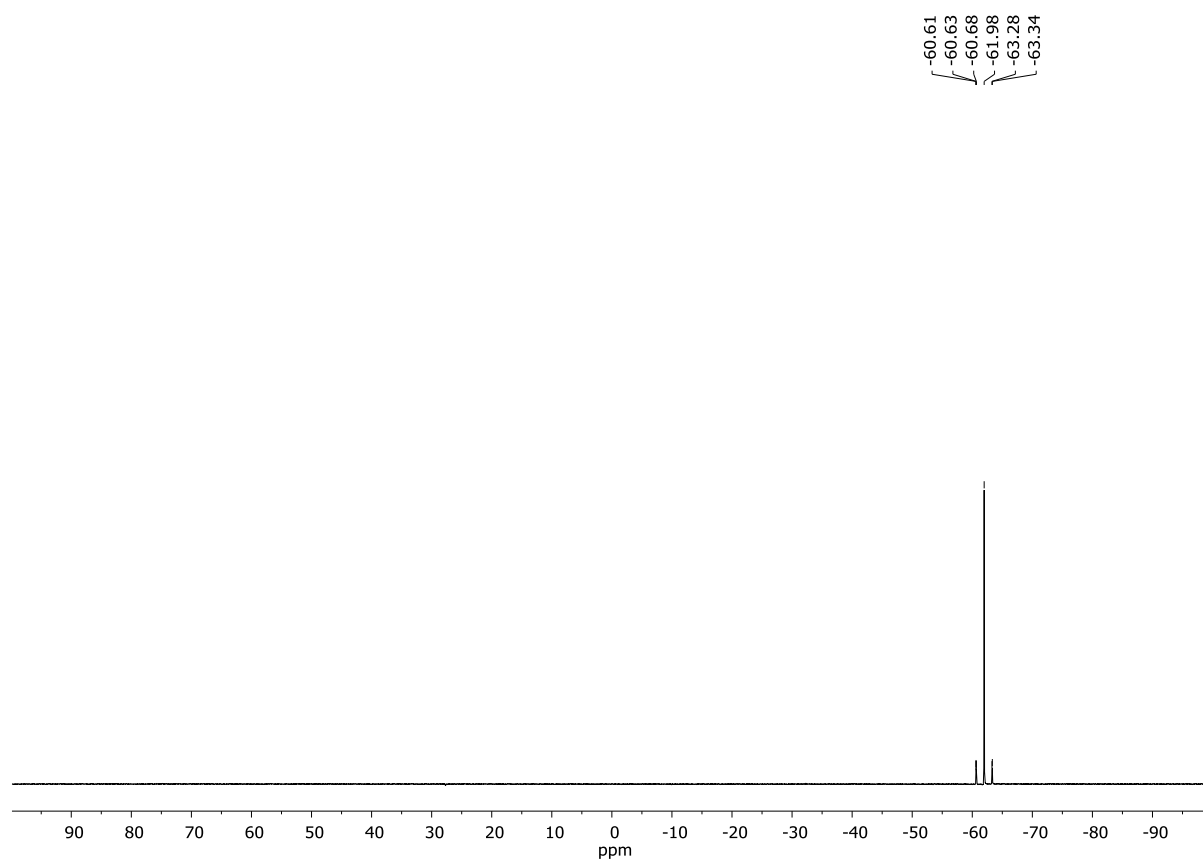

Fig SI 32:  $^{31}\text{P}\{^1\text{H}\}$  NMR (243 MHz) of compound **H** in benzene- $d_6$ .

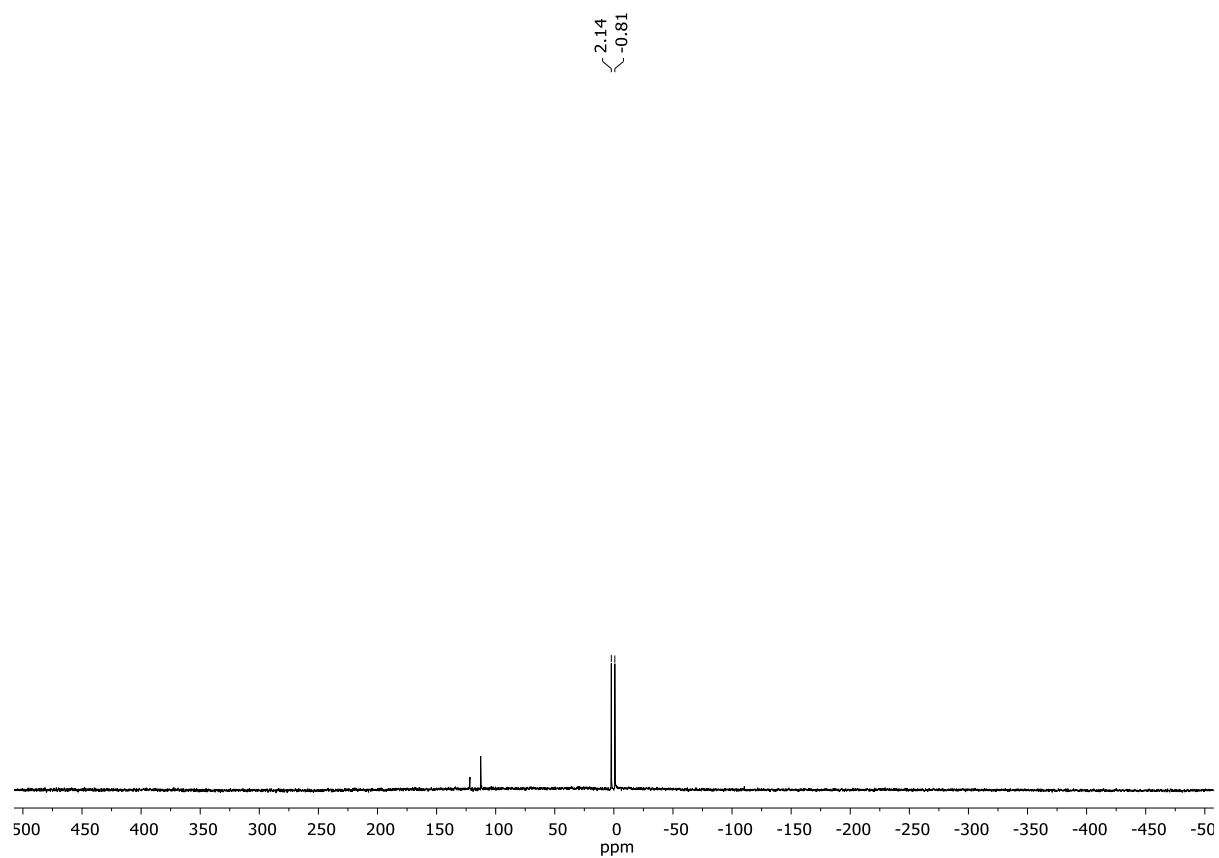

Fig SI 33:  $^{119}\text{Sn}\{^1\text{H}\}$  NMR (119 MHz) of compound **H** in benzene- $d_6$ .

## Single crystal analysis

Tabl. S11: Overview of essential crystal structure details for B, D, E and F.

|                                             | B                                                             | D                                                             | E                                                              | F                                                             |
|---------------------------------------------|---------------------------------------------------------------|---------------------------------------------------------------|----------------------------------------------------------------|---------------------------------------------------------------|
| CCDC                                        | 2106887                                                       | 2106888                                                       | 2108753                                                        | 2106889                                                       |
| Empirical formula                           | C <sub>30</sub> H <sub>32</sub> NP                            | C <sub>24</sub> H <sub>19</sub> P                             | C <sub>24</sub> H <sub>18</sub> LiP                            | C <sub>27</sub> H <sub>25</sub> BP                            |
| Formula weight                              | 437.53                                                        | 338.36                                                        | 344.29                                                         | 391.25                                                        |
| Temperature/K                               | 100.0                                                         | 100.0                                                         | 100.0                                                          | 100.0                                                         |
| Crystal system                              | triclinic                                                     | monoclinic                                                    | monoclinic                                                     | monoclinic                                                    |
| Space group                                 | P-1                                                           | P2 <sub>1</sub> /c                                            | P2 <sub>1</sub> /n                                             | P2 <sub>1</sub> /c                                            |
| a/Å                                         | 9.4189(3)                                                     | 7.5529(2)                                                     | 12.6051(9)                                                     | 11.8705(5)                                                    |
| b/Å                                         | 11.1819(4)                                                    | 20.0280(6)                                                    | 16.0123(12)                                                    | 10.2205(4)                                                    |
| c/Å                                         | 12.7140(4)                                                    | 11.7785(3)                                                    | 18.4340(12)                                                    | 17.8670(7)                                                    |
| α/°                                         | 89.0990(10)                                                   | 90                                                            | 90                                                             | 90                                                            |
| β/°                                         | 76.1210(10)                                                   | 94.2750(10)                                                   | 104.712(2)                                                     | 93.7090(10)                                                   |
| γ/°                                         | 70.6150(10)                                                   | 90                                                            | 90                                                             | 90                                                            |
| Volume/Å <sup>3</sup>                       | 1223.28(7)                                                    | 1776.77(8)                                                    | 3598.7(4)                                                      | 2163.13(15)                                                   |
| Z                                           | 2                                                             | 4                                                             | 8                                                              | 4                                                             |
| ρ <sub>calc</sub> /cm <sup>3</sup>          | 1.188                                                         | 1.265                                                         | 1.271                                                          | 1.201                                                         |
| μ/mm <sup>-1</sup>                          | 0.130                                                         | 0.157                                                         | 0.156                                                          | 0.137                                                         |
| F(000)                                      | 468.0                                                         | 712.0                                                         | 1440.0                                                         | 828.0                                                         |
| Crystal size/mm <sup>3</sup>                | 0.23 × 0.21 × 0.18                                            | 0.28 × 0.19 × 0.16                                            | 0.24 × 0.23 × 0.21                                             | 0.26 × 0.2 × 0.19                                             |
| Radiation                                   | MoKα (λ = 0.71073)                                            | MoKα (λ = 0.71073)                                            | MoKα (λ = 0.71073)                                             | MoKα (λ = 0.71073)                                            |
| 2θ range for data collection/°              | 5.472 to 66.998                                               | 5.346 to 57                                                   | 4.2 to 61.016                                                  | 4.594 to 59.996                                               |
| Index ranges                                | -14 ≤ h ≤ 14, -17 ≤ k ≤ 17, -19 ≤ l ≤ 19                      | -10 ≤ h ≤ 9, -26 ≤ k ≤ 26, -15 ≤ l ≤ 15                       | -18 ≤ h ≤ 18, -22 ≤ k ≤ 22, -26 ≤ l ≤ 26                       | -16 ≤ h ≤ 16, -14 ≤ k ≤ 14, -25 ≤ l ≤ 25                      |
| Reflections collected                       | 102866                                                        | 36505                                                         | 108594                                                         | 78277                                                         |
| Independent reflections                     | 9585 [R <sub>int</sub> = 0.0282, R <sub>sigma</sub> = 0.0149] | 4485 [R <sub>int</sub> = 0.0402, R <sub>sigma</sub> = 0.0225] | 10966 [R <sub>int</sub> = 0.0504, R <sub>sigma</sub> = 0.0288] | 6303 [R <sub>int</sub> = 0.0291, R <sub>sigma</sub> = 0.0146] |
| Data/restraints/parameters                  | 9585/0/293                                                    | 4485/0/231                                                    | 10966/0/469                                                    | 6303/3/277                                                    |
| Goodness-of-fit on F <sup>2</sup>           | 1.050                                                         | 1.040                                                         | 1.035                                                          | 1.056                                                         |
| Final R indexes [I ≥ 2σ (I)]                | R <sub>1</sub> = 0.0333, wR <sub>2</sub> = 0.0922             | R <sub>1</sub> = 0.0389, wR <sub>2</sub> = 0.0874             | R <sub>1</sub> = 0.0447, wR <sub>2</sub> = 0.1085              | R <sub>1</sub> = 0.0352, wR <sub>2</sub> = 0.0927             |
| Final R indexes [all data]                  | R <sub>1</sub> = 0.0381, wR <sub>2</sub> = 0.0960             | R <sub>1</sub> = 0.0466, wR <sub>2</sub> = 0.0912             | R <sub>1</sub> = 0.0603, wR <sub>2</sub> = 0.1170              | R <sub>1</sub> = 0.0403, wR <sub>2</sub> = 0.0974             |
| Largest diff. peak/hole / e Å <sup>-3</sup> | 0.48/-0.29                                                    | 0.38/-0.32                                                    | 0.50/-0.36                                                     | 0.38/-0.31                                                    |
